# Supplementary material for: Transposable element accumulation drives size differences among polymorphic Y Chromosomes in Drosophila
Source: HighWire-hosted journal article supplement (doi:10.1101/gr.275996.121), 2022-05-02
Supplement: Supplementary_Tables.xlsx [file Supplementary_Tables.xlsx]

## Sheet: Table S1
Table S1. Starting wild-type strain information
Y replacement line	Original Strain	Location	Collection Year	Strain donor
Large_Y	DPSE .124	Sinaloa, Mexico	2002	Cornell Stock Center
Medium_Y	KB10 PSU 1105	Kaibab National Forest, AZ	1998	Stephen Schaeffer
Small_Y	MV25*	Mesa Verde, CO	1996	Stephen Schaeffer
Y01	BdA BMC4	Bosque del Apache, NM	1998	Stephen Schaeffer
Y02	BdA BMC5	Bosque del Apache, NM	1998	Stephen Schaeffer
Y03	BdA BMC8	Bosque del Apache, NM	1998	Stephen Schaeffer
Y04	DPSE .100	Oaxaca, Mexico	2003	Cornell Stock Center
Y05	DPSE .105	Mesa Verde, CO	2001	Cornell Stock Center
Y06	DPSE .122	Sonora, Mexico	2006	Cornell Stock Center
Y07	DPSE .126	Chiapas, Mexico	2002	Cornell Stock Center
Y08	DPSE .198	Pike's Peak, CO	No record.	Cornell Stock Center
Y09	KB1 PSU 1097	Kaibab National Forest, AZ	1998	Stephen Schaeffer
Y10	KB3 PSU 1099	Kaibab National Forest, AZ	1998	Stephen Schaeffer
Y11	KB4 PSU 1100	Kaibab National Forest, AZ	1998	Stephen Schaeffer
Y12	PP DM 1054 L	Daris Mts, TX	1998	Stephen Schaeffer
Y13	PP DM 1065 L	Daris Mts, TX	1998	Stephen Schaeffer
Y14	PP DM 1081 L	Daris Mts, TX	1998	Stephen Schaeffer
Y15	PP DM 1084 B	Daris Mts, TX	1998	Stephen Schaeffer
Y16	RBB 03	Walnut Creek, CA	2017	Ryan Bracewell
Y17	RBB 06	Walnut Creek, CA	2017	Ryan Bracewell
Y18	ST JR 84 B	James Reserve, CA	1998	Stephen Schaeffer
Y19	ST JR 138 L	James Reserve, CA	1998	Stephen Schaeffer
Y20	ST JR 158 L	James Reserve, CA	1998	Stephen Schaeffer
Y21	ST JR 209 L	James Reserve, CA	1998	Stephen Schaeffer
Y22	y;gl;or;inc	NA	See Orr (1987).	Nitin Phadnis
Y23	Z31	Zion Park, UT	2013	Nitin Phadnis
Y24	Z17	Zion Park, UT	2013	Nitin Phadnis
Y25	Z27	Zion Park, UT	2013	Nitin Phadnis
*note this is the D. pseudoobscura line used for the reference genome sequence

## Sheet: Table S2
Table S2. Inferred Y chromosome size by karyotype measurements
Y-replacement Line	Y/X ratio	SD	N
Large_Y	0.706	0.162	9
Medium_Y	0.544	0.107	7
Small_Y	0.502	0.111	3
Y01	0.46	0.135	7
Y02	0.516	0.46	4
Y03	0.567	0.95	14
Y04	0.534	0.079	4
Y05	0.452	0.056	6
Y06	0.546	0.085	7
Y07	0.475	0.081	14
Y08	0.439	0.081	6
Y09	0.523	0.097	8
Y10	0.538	0.135	5
Y11	0.585	0.034	3
Y12	0.515	0.145	4
Y13	0.496	0.089	4
Y14	0.527	0.103	6
Y15	0.532	0.048	7
Y16	0.52	0.062	8
Y17	0.586	0.103	7
Y18	0.494	0.066	7
Y19	0.5	0.97	3
Y20	0.479	0.065	11
Y21	0.579	0.0765	3
Y22	0.469	0.156	7
Y23	0.485	0.121	5
Y24	0.421	0.654	3
Y25	0.487	0.069	7

## Sheet: Table S3
Table S3. Inferred Y chromosome morphology by chromosome arm ratios (data underlying Figure 1B)
Y-replacement Line	Arm ratio (L:S)	SD	N	Morphology
Large_Y	1.12469	0.089961	12	Metacentric
Medium_Y	2.0618	0.500191	11	Acrocentric
Small_Y	2.68691	0.384921	3	Acrocentric
Y01	1.52507	0.266701	7	Submetacentric
Y02	2.5652	0.989673	4	Acrocentric
Y03	2.92121	0.779165	16	Acrocentric
Y04	2.6409	0.799853	4	Acrocentric
Y05	3.0219	0.816524	6	Acrocentric
Y06	2.93197	0.374407	8	Acrocentric
Y07	2.87931	0.348444	19	Acrocentric
Y08	2.69521	0.25344	6	Acrocentric
Y09	2.89392	0.438213	8	Acrocentric
Y10	2.6039	0.457488	5	Acrocentric
Y11	2.31826	0.174586	3	Acrocentric
Y12	2.76594	0.55609	4	Acrocentric
Y13	1.58323	0.385557	7	Submetacentric
Y14	3.67571	1.21753	6	Acrocentric
Y15	2.90138	0.389006	8	Acrocentric
Y16	2.54715	0.466505	9	Acrocentric
Y17	2.46166	0.37721	7	Acrocentric
Y18	2.89594	0.677159	7	Acrocentric
Y19	2.58549	0.454224	3	Acrocentric
Y20	3.09734	0.450096	11	Acrocentric
Y21	2.76031	0.581414	3	Acrocentric
Y22	2.31352	0.449333	7	Acrocentric
Y23	1.63895	0.366921	7	Submetacentric
Y24	3.69811	0.523238	3	Acrocentric
Y25	2.91376	0.422421	7	Acrocentric

## Sheet: Table S4
Table S4. Y-replacement line male genome size estimates and morphology (data underlying Figure 1C)
Y-replacement line	Genome size (Mb)	SD	N	Y Morphology
Female (line)	179.01	0.4	3	NA
Large_Y	173.83	0.7	6	Metacentric
Medium_Y	166.45	0.35	4	Acrocentric
Small_Y	160.94	0.46	3	Acrocentric
Y01	160.9	0.23	3	Submetacentric
Y02	161.3	0.37	3	Acrocentric
Y03	161.65	1.02	3	Acrocentric
Y04	160.46	0.27	3	Acrocentric
Y05	161.22	0.7	4	Acrocentric
Y06	162.03	0.83	3	Acrocentric
Y07	161.14	0.73	3	Acrocentric
Y08	160.98	0.27	3	Acrocentric
Y09	161.73	0.48	3	Acrocentric
Y10	159.08	0.19	3	Acrocentric
Y11	160.02	1.12	5	Acrocentric
Y12	159.93	0.86	3	Acrocentric
Y13	160.84	0.66	3	Submetacentric
Y14	161.88	0.78	5	Acrocentric
Y15	160.88	0.64	3	Acrocentric
Y16	160.4	0.4	3	Acrocentric
Y17	160.34	0.21	2	Acrocentric
Y18	161.55	0.56	3	Acrocentric
Y19	160.89	1.7	3	Acrocentric
Y20	162.01	0.46	3	Acrocentric
Y21	161.02	0.9	4	Acrocentric
Y22	158.54	0.65	4	Acrocentric
Y23	161.6	0.89	4	Submetacentric
Y24	160.74	1.27	5	Acrocentric
Y25	160.33	0.32	3	Acrocentric

## Sheet: Table S5
Table S5. Heterochromatin estimates of Y-replacement lines (data underlying Figure 1D).
Line	mean	SD	N
%AT (rel. to D.virilis)
Large_Y	0.404	0.0061	6
Medium_Y	0.385	0.0038	6
Small_Y	0.369	0.0043	5
Female (line)	0.402	0.0047	6
4C:2C DNA Thorax
Large_Y	1.858	0.069	8
Medium_Y	1.87	0.063	6
Small_Y	1.923	0.05	7
Female (line)	1.969	0.025	7

## Sheet: Table S6
Table S6. Summary of genomic sequencing data and statistics
Strain	Data type	Platform	Tissue	Figure	SRA Accession	Coverage	Reads generated
Small Y	gDNA-Seq	Illumina HiSeq 2500	brain	Fig 2-5	SRR18151030	16.0498	28087208
Medium Y	gDNA-Seq	Illumina HiSeq 2500	brain	Fig 2-3	SRR18151029	15.5708	27248826
Large Y	gDNA-Seq	Illumina HiSeq 2500	brain	Fig 2-5	SRR18151028	19.5226	34164586
Small Y	gDNA-Seq	MinION	whole body	Fig 2-5	SRR18151022	75.6137	485379
Medium Y	gDNA-Seq	MinION	whole body	Fig 2-3	SRR18151021	47.8264	540115
Large Y	gDNA-Seq	MinION	whole body	Fig 2-6	SRR18151020	54.1669	482379
Sequenced Female	gDNA-Seq	Illumina HiSeq 2500	whole body	Fig 2	SRR18151027	48.1885	84329824
Small Y D.affinis	gDNA-Seq	Illumina HiSeq 2500	brain	Fig 6	SRR18151025	10.4511	20902176
Medium Y D.affinis	gDNA-Seq	Illumina HiSeq 2500	brain	Fig 6	SRR18151024	9.01017	18020342
Large Y D.affinis	gDNA-Seq	Illumina HiSeq 2500	brain	Fig 6	SRR18151023	10.3196	20639206
Small Y (Young #1)	RNA-Seq	Illumina HiSeq 4000	heads	Fig 5	SRR18151014	66.1578	115776178
Small Y (Old #1)	RNA-Seq	Illumina HiSeq 4000	heads	Fig 5	SRR18151036	56.4014	98702434
Large Y (Young #1)	RNA-Seq	Illumina HiSeq 4000	heads	Fig 5	SRR18151034	54.1879	94828816
Large Y (Old #1)	RNA-Seq	Illumina HiSeq 4000	heads	Fig 5	SRR18151032	76.3362	133588434
Small Y (Young #2)	RNA-Seq	Illumina HiSeq 4000	heads	Fig 5	SRR18151013	51.4406	90021080
Small Y (Old #2)	RNA-Seq	Illumina HiSeq 4000	heads	Fig 5	SRR18151035	57.1453	100004232
Large Y (Young #2)	RNA-Seq	Illumina HiSeq 4000	heads	Fig 5	SRR18151033	55.6926	97461998
Large Y (Old #2)	RNA-Seq	Illumina HiSeq 4000	heads	Fig 5	SRR18151031	63.6603	111405610
Small Y Input #1	gDNA-Seq	Illumina HiSeq 2500	brain	Fig 4	SRR18151018	25.9924	45486750
Small Y ChIP #1	ChIP-Seq	Illumina HiSeq 2500	brain	Fig 4	SRR18151038	28.3223	49564064
Large Y Input #1	gDNA-Seq	Illumina HiSeq 2500	brain	Fig 4	SRR18151016	26.4294	46251508
Large Y ChIP #1	ChIP-Seq	Illumina HiSeq 2500	brain	Fig 4	SRR18151026	27.0547	47345668
Small Y Input #2	gDNA-Seq	Illumina HiSeq 2500	brain	Fig 4	SRR18151017	38.7146	67750570
Small Y ChIP #2	ChIP-Seq	Illumina HiSeq 2500	brain	Fig 4	SRR18151037	52.9805	92715940
Large Y Input #2	gDNA-Seq	Illumina HiSeq 2500	brain	Fig 4	SRR18151015	26.32	46060046
Large Y ChIP #2	ChIP-Seq	Illumina HiSeq 2500	brain	Fig 4	SRR18151019	30.3958	53192702

## Sheet: Table S7
Table S7. Summary statistics of Y chromosome assemblies. Note that the assemblies are not adjusted for the copy number of each contig.
Strain	QuickMerge direction	N50	Max Scaffold	Genome Size (without coverage)	No. scaffolds	GC content	Repeat Masked bp	% Repeat Masked
YS	(Canu to Falcon) to (Falcon to Canu)	215074	1097706	34545044	246	44.64	30461567	0.881793
YM	(Canu to Falcon) to (Falcon to Canu)	330156	1009159	34567851	201	45.01	30742053	0.889325
YL	(Canu to Falcon) to (Falcon to Canu)	816342	3351422	55037118	139	42.52	48090697	0.873787

## Sheet: Table S8
Table S8. Contigs, their length, bp repeats masked, and M and F and inferred coverage ratio in YS assembly.
Contig	Length	Male Cov.	Female Cov.	Log2(Female/Male)	Copy Number	Masked (bp)
000063F_pilon	327075	10.7	3.33	-1.35	1	284041
000123F_pilon	88962	23.97	7.9	-1.29	2	78081
000128F_pilon	89019	18.71	7.19	-1.52	2	88669
000143F_pilon	112653	8.68	1.61	-2.05	1	78840
000145F_pilon	314034	22.98	7.02	-1.65	2	311816
000177F_pilon	215074	22.33	7.08	-1.67	2	213528
000190F_pilon	55191	19.26	3.44	-1.99	2	43231
000209F_pilon	97090	15.13	3.75	-1.41	1	82628
000331F_pilon	49520	15.92	5.91	-1.39	1	49022
000356F_pilon	46827	10.49	2.27	-1.63	1	37191
000360F_pilon	51099	23.44	7.97	-1.52	2	51065
000431F_pilon	222677	14.42	6.84	-0.87	1	198523
tig00000002_pilon_Y	149310	16.56	5.15	-1.27	1	143494
tig00000098_pilon	104472	16.89	0.33	-5.91	1	102716
tig00000112_pilon	80688	15.63	7.02	-0.92	1	77166
tig00000302_pilon	802319	11.84	3.62	-1.39	1	689628
tig00000350_pilon	151521	10.68	3.13	-1.46	1	120573
tig00000398_pilon	597038	12.18	4.99	-1.21	1	540661
tig00000428_pilon	546602	11.02	3.41	-1.49	1	487691
tig00000502_pilon	48353	7.92	1.13	-2.2	1	33423
tig00000504_pilon	139332	19.01	6.12	-1.5	2	137458
tig00000529_pilon	61221	11.77	0.95	-2.96	1	59145
tig00000594_pilon	66873	5.19	1.53	-1.37	1	50654
tig00000614_pilon	111047	12.91	4.55	-1.64	1	96713
tig00000673_pilon	141245	10.66	1.68	-2.61	1	130092
tig00000739_pilon	130045	12.13	2	-2.08	1	118635
tig00000744_pilon	34237	9.68	3.02	-2.22	1	34106
tig00000804_pilon	184061	13.85	1.93	-2.5	1	160643
tig00000808_pilon	77978	11.07	0.97	-3.21	1	66464
tig00000882_pilon	183480	7.16	2.81	-1.71	1	171628
tig00000890_pilon	29822	13.9	0	-Inf	1	29773
tig00000894_pilon	28310	15.7	3.91	-1.8	1	27536
tig00000933_pilon	50364	19.99	7.39	-1.46	2	49889
tig00000937_pilon	1097706	12.57	4.66	-1.3	1	991815
tig00001055_pilon	44587	25.49	0	-Inf	2	44119
tig00001070_pilon	149808	21.91	7.2	-1.66	2	149770
tig00001087_pilon	154635	10.49	3.73	-1.68	1	140501
tig00001099_pilon	89410	18.17	5.52	-1.64	1	89384
tig00001124_pilon	61462	7.61	1.22	-2.23	1	53997
tig00001140_pilon	90677	17.37	9.09	-0.71	1	59284
tig00001164_pilon	49809	25.17	8.36	-1.67	2	49481
tig00001191_pilon	462007	12.32	3.62	-1.51	1	413817
tig00001226_pilon	79876	7.64	1.7	-2.18	1	63378
tig00001251_pilon	524451	13.4	6.47	-1.02	1	469794
tig00001284_pilon	62320	20.57	3.4	-2.19	2	61460
tig00001290_pilon	97962	13.29	2.34	-2.65	1	96808
tig00001312_pilon	227681	9.19	2.04	-2.02	1	168525
tig00001320_pilon	110160	11.45	5.73	-1.14	1	60988
tig00001323_pilon	216098	11.33	3.83	-1.39	1	169792
tig00001355_pilon	313464	13.16	4.18	-1.46	1	291504
tig00001366_pilon	208387	13.16	5.41	-1.15	1	184244
tig00001367_pilon	287945	14.04	4.81	-1.48	1	251398
tig00001381_pilon	35584	17.35	0.03	-8.84	1	35395
tig00001411_pilon	135323	8.43	2.71	-1.49	1	128532
tig00001450_pilon	337770	10.23	2.8	-1.61	1	287475
tig00001525_pilon	39558	30.69	1.88	-3.47	2	38835
tig00001556_pilon	152706	17.27	1.05	-3	1	104197
tig00001558_pilon	119495	17.22	1.46	-3.58	1	118683
tig00001609_pilon	41919	11.68	0.01	-10.4	1	41775
tig00001710_pilon	111079	11.48	3.53	-1.53	1	96858
tig00001804_pilon	124919	17.52	5.9	-1.57	1	120995
tig00001842_pilon	95267	13.98	5.24	-1.51	1	93309
tig00001932_pilon	133770	11.9	1.84	-1.81	1	101824
tig00001966_pilon	103621	13.61	1.93	-1.83	1	87391
tig00001996_pilon	133785	11.58	3.7	-1.31	1	118949
tig00002060_pilon	93687	12.64	3.82	-1.83	1	93176
tig00002165_pilon	129043	20.13	5.55	-1.75	2	128746
tig00002214_pilon	191805	22.81	7.3	-1.62	2	191050
tig00002216_pilon	176324	23.76	8.95	-1.24	2	166363
tig00002255_pilon	88009	15.73	4.03	-2.18	1	87230
tig00002268_pilon	44168	21.3	0.38	-5.8	2	43868
tig00002334_pilon	69322	9.27	0.8	-3.31	1	66571
tig00002342_pilon	250969	22.33	7.01	-1.47	2	250531
tig00002441_pilon	61517	22.38	6.48	-1.54	2	61466
tig00002522_pilon	143680	10.4	2.33	-2.1	1	110166
tig00002544_pilon	78477	8.33	2.21	-0.89	1	61757
tig00002599_pilon	61295	11.05	1.84	-1.71	1	55724
tig00002604_pilon	72624	12.25	4.45	-0.95	1	64335
tig00002638_pilon	49904	8.34	2.65	-1.83	1	44456
tig00002890_pilon	42874	18.08	10.24	-1.71	1	14057
tig00002946_pilon	121065	21.37	6.96	-1.61	2	118539
tig00002966_pilon	41271	14.16	3.17	-2.04	1	40477
tig00002970_pilon	36024	11.04	3.21	-1.49	1	35924
tig00003058_pilon	64629	9.9	4.75	-1.06	1	31343
tig00003115_pilon	41832	16.81	4.86	-1.71	1	41828
tig00003135_pilon	56190	20.21	6.27	-1.66	2	56190
tig00003293_pilon	28308	20.13	5.27	-1.9	2	28305
tig00003383_pilon	48425	20.12	6.94	-1.66	2	48420
tig00004056_pilon	16452	8.37	1.24	-3.6	1	16293
tig00004717_pilon	16369	24.2	7.95	-1.65	2	16367
tig00005616_pilon	80499	9.45	1.53	-2.23	1	77694
tig00005747_pilon	46132	12.49	4.23	-1.68	1	46093
tig00006381_pilon	195061	12.11	1.47	-2.73	1	168325
tig00006382_pilon	185113	15.71	1.95	-2.68	1	156803
tig00006383_pilon	230626	12.41	3.78	-1.65	1	176259
tig00006385_pilon	56289	11.09	3.31	-1.81	1	51815
tig00006386_pilon	123818	19.28	3.6	-1.73	2	86511
tig00006387_pilon	255124	11.74	6.77	-0.84	1	159099
tig00006389_pilon	62182	10.83	6.84	-0.93	1	35264
tig00006390_pilon	47086	15.5	0.79	-3.55	1	46661
tig00006391_pilon	143252	9.88	0	-Inf	1	142290
tig00006393_pilon	64104	9.21	0.12	-6.25	1	61927
tig00006396_pilon	63563	8.21	0	-Inf	1	63330
tig00006398_pilon	38759	11.01	5.66	-1.18	1	38332
tig00006401_pilon	478931	14.35	5.51	-1.2	1	424879
tig00006405_pilon	500693	15.91	3.37	-1.83	1	439905
tig00006407_pilon	68677	15.55	2.74	-2.54	1	66769
tig00006409_pilon	523050	14.07	5.09	-1.37	1	472490
tig00006410_pilon	225304	8.69	2	-1.85	1	203600
tig00006412_pilon	119270	11.82	2.1	-2.62	1	107143
tig00006413_pilon	55339	12.99	6.26	-1.14	1	54115
tig00006415_pilon	414326	10.7	4.21	-1.38	1	323285
tig00006417_pilon	45860	9.05	2.57	-1.84	1	34821
tig00006421_pilon	26562	6.51	0.48	-4.2	1	26342
tig00006424_pilon	58348	17.08	8.6	-0.96	1	14429
tig00006425_pilon	232724	5.42	2.05	-1.6	1	46174
tig00006426_pilon	42523	12.58	5.76	-1.01	1	16432
tig00006429_pilon	422132	11.46	3.27	-1.43	1	371175
tig00006430_pilon	44551	12.04	0.81	-2.67	1	30164
tig00006431_pilon	47947	7.88	0	-Inf	1	45203
tig00006432_pilon	60112	7.41	0	-Inf	1	59661
tig00006436_pilon	117208	14.3	4.96	-1.43	1	115261
tig00006440_pilon	37246	7.56	1.77	-2.62	1	37144
tig00006441_pilon	25477	11.87	0.27	-6.19	1	25416
tig00006442_pilon	505015	13.03	4.81	-1.39	1	455991
tig00006443_pilon	58953	17.13	2.19	-2.88	1	58775
tig00006448_pilon	679427	11.09	3.78	-1.42	1	579085
tig00006451_pilon	180933	14.86	5.79	-1.38	1	167247
tig00006452_pilon	479854	12.81	5.14	-1.21	1	426093
tig00006458_pilon	54143	15.86	9.24	-0.57	1	48651
tig00006461_pilon	81626	9.81	2.46	-0.98	1	76815
tig00006463_pilon	178456	7.09	1.34	-1.51	1	133293
tig00006464_pilon	93431	12.13	0	-Inf	1	93018
tig00006465_pilon	52037	5.54	0.35	-2.35	1	48264
tig00006469_pilon	57469	12.57	2.69	-1.72	1	57023
tig00006471_pilon	139461	16.04	4.8	-1.23	1	136570
tig00006472_pilon	102537	14.52	6.62	-1.23	1	79578
tig00006474_pilon	562919	10.87	3.12	-1.63	1	462846
tig00006476_pilon	255512	10.08	1.62	-2.04	1	222147
tig00006479_pilon	58832	8.62	0.9	-1.95	1	53488
tig00006480_pilon	78495	17.38	1.36	-3.39	1	75594
tig00006481_pilon	54065	25.27	0	-Inf	2	53474
tig00006482_pilon	33685	18.32	3.02	-3.25	1	33574
tig00006483_pilon	65946	10.39	1.26	-2.42	1	61177
tig00006485_pilon	84104	8.66	1.28	-2.55	1	63014
tig00006486_pilon	228387	12.04	4.28	-1.4	1	194570
tig00006488_pilon	26632	17.27	5.51	-1.65	1	24253
tig00006490_pilon	78720	7.58	1.92	-1.27	1	77503
tig00006497_pilon	36369	20.71	6.4	-1.86	2	36263
tig00006500_pilon	159980	35.4	1.09	-5.15	3	159934
tig00006501_pilon	236377	11.67	2.83	-1.57	1	227628
tig00006503_pilon	61224	6.99	1.46	-1.94	1	41428
tig00006504_pilon	53749	10.24	1.82	-1.86	1	46672
tig00006505_pilon	142317	14.58	6.6	-1.03	1	133773
tig00006509_pilon	38774	15.6	4.66	-1.57	1	38551
tig00006510_pilon	186096	16.83	8.55	-0.91	1	109005
tig00006512_pilon	80415	10.21	3.93	-1.1	1	74600
tig00006515_pilon	47963	14.72	4.76	-1.7	1	47079
tig00006518_pilon	89704	15.85	2.19	-2.93	1	74727
tig00006519_pilon	239001	10.37	2.57	-1.68	1	204239
tig00006520_pilon	82875	12.69	4.11	-1.28	1	71353
tig00006522_pilon	115466	11.58	3.86	-1.39	1	97800
tig00006523_pilon	33356	11.52	0.89	-3.74	1	22278
tig00006524_pilon	295689	13.56	4.84	-1.1	1	269315
tig00006527_pilon	170220	12.19	4.46	-1.35	1	138172
tig00006529_pilon	205755	9.45	2.82	-1.64	1	192290
tig00006530_pilon	59807	15.06	3.38	-2.05	1	59718
tig00006532_pilon	33595	20.03	6.12	-1.42	2	33517
tig00006533_pilon	232246	12.85	4.4	-1.43	1	216395
tig00006535_pilon	26852	41.37	1.98	-4.43	3	26851
tig00006538_pilon	213531	11.59	3.57	-1.6	1	178575
tig00006543_pilon	222707	10.33	2.89	-1.42	1	168999
tig00006546_pilon	72874	10.04	1.86	-2.11	1	65001
tig00006548_pilon	313087	12.19	4.74	-1.2	1	301875
tig00006552_pilon	24220	17.08	3.98	-1.81	1	24088
tig00006553_pilon	67988	12.03	2.66	-1.97	1	56187
tig00006555_pilon	89001	15.61	1.91	-3.09	1	89001
tig00006557_pilon	34156	13.73	1.75	-2.52	1	34147
tig00006562_pilon	71420	12.11	1.66	-2.83	1	71407
tig00006569_pilon	47475	16.3	0.28	-6.91	1	47331
tig00006570_pilon	42174	15.18	0	-Inf	1	41948
tig00006571_pilon	120040	11.71	3.78	-1.41	1	115060
tig00006572_pilon	45973	4.26	2.4	-0.85	1	20416
tig00006573_pilon	32999	54.24	18.57	-1.61	4	9781
tig00006576_pilon	45890	14.77	1.55	-2.55	1	45590
tig00006577_pilon	58407	10.77	0.41	-5.14	1	57897
tig00006579_pilon	71343	12.06	3.07	-1.99	1	71073
tig00006581_pilon	49590	12.38	3.56	-1.72	1	14169
tig00006585_pilon	99997	21.37	8.49	-1.2	2	75493
tig00006586_pilon	138363	24.24	8.24	-1.7	2	119714
tig00006587_pilon	39698	24.24	7.51	-1.81	2	10598
tig00006595_pilon	203932	9.88	1.76	-1.7	1	195176
tig00006596_pilon	62881	16.69	1.14	-3.64	1	62766
tig00006597_pilon	69752	7.62	1.57	-1.92	1	51231
tig00006598_pilon	146174	11.21	3.62	-1.41	1	139664
tig00006601_pilon	556273	12.96	4.37	-1.47	1	494077
tig00006602_pilon	792254	11.74	4.98	-1.3	1	754711
tig00006608_pilon	112922	12.83	3.66	-1.58	1	112439
tig00006621_pilon	151271	7.7	0.79	-2.52	1	135267
tig00006624_pilon	71768	16.97	4.03	-2.05	1	71511
tig00035846_pilon	72238	8.82	3.63	-1.13	1	62712
tig00035849_pilon	161398	11.44	2.78	-1.92	1	127621
tig00035851_pilon	289526	10.2	2.79	-1.39	1	224099
tig00035856_pilon	120986	11.75	2.78	-1.45	1	115652
tig00035858_pilon	29066	15.09	1.09	-3.59	1	28975
tig00035862_pilon	668221	11.04	3.96	-1.53	1	556975
tig00035865_pilon	55886	9.37	1.95	-2.69	1	37536
tig00035869_pilon	25793	13.5	4.66	-1.53	1	25702
tig00035870_pilon	153760	8.6	3.66	-1.21	1	143866
tig00035875_pilon	397375	10.16	3.8	-1.43	1	381835
tig00035877_pilon	42003	19.92	0.16	-6.69	2	41607
tig00035878_pilon	333331	7.35	2.7	-1.69	1	321451
tig00035880_pilon	181572	13.6	3.6	-1.97	1	159132
tig00035887_pilon	122738	8.25	1.8	-1.94	1	113615
tig00035888_pilon	150083	17.07	1.21	-2.62	1	112812
tig00035892_pilon	62811	7.38	0.76	-2.51	1	51518
tig00035897_pilon	39258	11.26	3.35	-1.67	1	17093
tig00035902_pilon	129592	11.28	3.85	-1.38	1	119857
tig00035904_pilon	24399	9.87	2.91	-1.27	1	24265
tig00035905_pilon	125918	13.47	3.85	-1.58	1	125070
tig00035907_pilon	22079	13.29	3.6	-1.86	1	22073
tig00035908_pilon	46749	11.57	4.09	-1.9	1	46731
tig00035912_pilon	171998	20.86	6.88	-1.52	2	168002
tig00035918_pilon	29361	21.8	0	-Inf	2	29301
tig00035919_pilon	48156	9.2	0.03	-6.72	1	48022
tig00035922_pilon	170486	7.34	1.04	-2.16	1	165058
tig00035925_pilon	34257	15.27	4.53	-1.56	1	13381
tig00035928_pilon	92316	15.55	5.49	-1.36	1	83515
tig00035929_pilon	35702	11.06	0.19	-3.58	1	35366
tig00035930_pilon	36894	12.35	5.35	-1.03	1	36372
tig00035934_pilon	69898	6.34	0.5	-3.16	1	66776
tig00035938_pilon	206570	22.69	8.27	-1.65	2	205927
tig00035940_pilon	25472	22.14	6.58	-1.53	2	25361
tig00035941_pilon	21145	15.89	4.37	-1.14	1	20054
tig00035943_pilon	99575	5.15	1.22	-1.7	1	91726
tig00035944_pilon	82703	8.21	2.53	-1.76	1	77339
tig00035947_pilon	20339	9.07	2.51	-2.4	1	17986
tig00035965_pilon	183489	12.44	5.02	-1.33	1	175142
tig00035969_pilon	61089	6.3	2.24	-1.55	1	58113
tig00035972_pilon	154910	11.13	4.87	-1.29	1	154192
tig00035981_pilon	41142	31.65	10.21	-1.75	3	9807
tig00035983_pilon	57890	17.07	4.54	-1.79	1	57804
tig00035984_pilon	24390	16.69	5.39	-1.45	1	24292
tig00035988_pilon	80893	19.05	5.57	-1.52	2	79688
tig00035991_pilon	80686	8.81	0.87	-3.69	1	77526
tig00035993_pilon	131341	7.28	1.86	-1.46	1	114804

## Sheet: Table S9
Table S9. Contigs, their length, bp repeats masked, and M and F and inferred coverage ratio in YM assembly.
Contig	Length	Male Cov.	Female Cov.	Log2(Female/Male)	Copy Number	Masked (bp)
000008F_pilon	506659	14.97	3.57	-1.89	1	439027
000014F_pilon_Y	389262	10.4	3.14	-1.47	1	336132
000017F_pilon	511433	19.04	4.61	-1.93	2	466742
000018F_pilon_Y	959593	15.7	4.18	-1.73	1	892942
000019F_pilon	530858	20.23	4.73	-2.11	2	430388
000022F_pilon	630106	18.19	4.12	-1.89	2	556736
000036F_pilon	348171	18.11	4.48	-1.71	2	324751
000041F_pilon	723953	11.82	4.23	-1.32	1	635183
000043F_pilon	188651	17.8	5.26	-1.79	1	170891
000049F_pilon	272274	14.79	3.36	-2.11	1	216605
000051F_pilon	233669	15.46	3.93	-1.4	1	190658
000065F_pilon	345576	10.28	3.48	-1.4	1	326351
000080F_pilon	238367	19.54	7.82	-1.21	2	228316
000086F_pilon	330156	14.24	3.74	-1.93	1	257899
000129F_pilon	109731	9.28	2.04	-1.88	1	89764
000144F_pilon	103043	10.96	3.68	-1.31	1	84407
000182F_pilon	93868	8.3	3.36	-1.13	1	92515
000217F_pilon	181448	21.25	7.7	-1.56	2	177410
000226F_pilon	59730	10.66	4.71	-1.25	1	52775
000589F_pilon	41158	10.04	2.45	-1.96	1	40781
tig00000006_pilon	301251	9.08	3.65	-1.47	1	244803
tig00000041_pilon	46386	10.29	1.99	-2.36	1	42732
tig00000058_pilon	245614	11.68	4.36	-1.32	1	220580
tig00000116_pilon	537963	10.02	3.6	-1.28	1	513059
tig00000146_pilon	76346	18.6	6.53	-1.45	2	76290
tig00000241_pilon	76596	10.68	0.91	-3.44	1	76153
tig00000258_pilon	45716	14.03	1.97	-2.73	1	45560
tig00000301_pilon	83855	6.29	1.76	-1.47	1	73842
tig00000399_pilon	62088	12.11	2.91	-1.97	1	60559
tig00000400_pilon	45285	19.16	0.28	-8.28	2	43983
tig00000410_pilon	47110	27.01	2.31	-6.39	2	46546
tig00000448_pilon	56678	19.54	7.58	-1.17	2	40081
tig00000450_pilon	66603	10.91	1.44	-2.92	1	64585
tig00000610_pilon	104039	7.75	2.15	-1.78	1	94875
tig00000947_pilon	588452	18.51	3.97	-2.17	2	554891
tig00000948_pilon	349296	18.5	4.36	-1.81	2	312703
tig00000954_pilon	69576	13.75	4.83	-1.42	1	69327
tig00000955_pilon	56972	17.9	5.66	-1.38	1	56915
tig00000971_pilon	173055	9.08	2.51	-1.35	1	172179
tig00000973_pilon	113798	9.48	1.12	-2.78	1	90148
tig00000983_pilon	50687	13.42	2.5	-2.26	1	36369
tig00000987_pilon	26936	9.84	0.1	-Inf	1	26561
tig00001008_pilon	143875	18.43	1.27	-3.5	2	142898
tig00001051_pilon	863408	9.84	2.38	-1.78	1	765587
tig00001063_pilon	395683	18.91	3.92	-2.17	2	375292
tig00001130_pilon	53302	23.51	0	-Inf	2	43768
tig00001135_pilon	134867	9.32	4.17	-1.72	1	117640
tig00001146_pilon	118239	11.89	6.53	-1.12	1	112759
tig00001217_pilon	165652	11.32	1.85	-2.28	1	130380
tig00001266_pilon	345765	11.66	4.25	-1.23	1	286763
tig00001273_pilon	40670	10.45	5.54	-1.36	1	38905
tig00001394_pilon	111335	18.15	6	-1.52	2	110588
tig00001429_pilon	479384	12.82	4.55	-1.38	1	457533
tig00001498_pilon	29202	7.76	1.33	-2.14	1	29164
tig00001598_pilon	73828	12.42	0.8	-3.38	1	73766
tig00001605_pilon	125211	7.93	2.14	-1.66	1	112712
tig00001606_pilon	114170	16.45	7.37	-1.3	1	112551
tig00001632_pilon	249280	8.75	1.98	-1.87	1	218150
tig00001690_pilon	529520	9.98	3.62	-1.37	1	470391
tig00001721_pilon	158577	6.46	0.74	-2.07	1	119080
tig00001734_pilon	137594	18.79	4.71	-1.52	2	131886
tig00001767_pilon	208705	15.05	1.44	-3.16	1	202337
tig00001802_pilon	783933	16.83	4.48	-1.61	1	697003
tig00001820_pilon	323691	12.8	3.73	-1.67	1	308031
tig00001969_pilon	28136	55.96	17.38	-1.62	5	9780
tig00001977_pilon	88778	14.16	2.89	-2.19	1	88719
tig00002011_pilon	52731	12.57	1.61	-3.22	1	52608
tig00002013_pilon	157086	9.85	3.34	-1.47	1	117000
tig00002047_pilon	359785	20.77	4.47	-1.95	2	343803
tig00002079_pilon	146591	15.97	5.88	-1.4	1	142445
tig00002122_pilon	156069	11	5.11	-1.06	1	143168
tig00002138_pilon	53978	10.84	0.2	-6.07	1	52765
tig00002153_pilon	84091	6.79	3.04	-0.95	1	50389
tig00002157_pilon	187749	17.76	6.42	-1.45	1	187199
tig00002169_pilon	25559	10.62	1.95	-2.31	1	20923
tig00002218_pilon	131654	18.23	6.15	-1.33	2	120411
tig00002257_pilon	85040	17.64	1.17	-2.15	1	55559
tig00002259_pilon	35742	72.5	24.08	-1.7	6	5284
tig00002266_pilon	68869	29.07	0.93	-5.01	2	68751
tig00002302_pilon	110420	6.83	1.3	-1.52	1	73166
tig00002313_pilon	114491	15.57	6.11	-1.34	1	110204
tig00002356_pilon	121265	14.49	5.24	-1.39	1	120904
tig00002392_pilon	471295	11.51	3.46	-1.55	1	410147
tig00002408_pilon	110818	16.37	6.04	-1.37	1	109437
tig00002411_pilon	38473	32.42	12.04	-1.58	3	14139
tig00002455_pilon	63655	19.45	1.65	-2.39	2	63595
tig00002476_pilon	94093	25.39	10.65	-1.17	2	92753
tig00002481_pilon	98662	13.01	3.05	-2.01	1	96436
tig00002551_pilon	174258	22.83	8.76	-1.33	2	173685
tig00002558_pilon	156184	10.17	2.6	-1.66	1	125123
tig00002610_pilon	61287	13.24	5.1	-1.44	1	61102
tig00002623_pilon	36183	13.89	5.46	-1.56	1	25523
tig00002772_pilon	105741	12.49	2.35	-2.32	1	92299
tig00002776_pilon	49407	6.95	1.96	-1.6	1	10646
tig00002803_pilon	76401	16.68	4.99	-1.62	1	76343
tig00002853_pilon	87223	13.14	4.04	-1.5	1	87183
tig00002938_pilon	33325	15.78	0.32	-6.74	1	33224
tig00002948_pilon	88074	14.02	4.64	-1.42	1	88055
tig00002957_pilon	104503	16.13	6.96	-1.56	1	104207
tig00003065_pilon	91819	13.63	4.89	-1.41	1	91506
tig00003089_pilon	37398	16.46	5.66	-1.57	1	37291
tig00003106_pilon	76221	11.73	4.75	-1.41	1	76119
tig00003136_pilon	30554	21.45	1.82	-3.72	2	29249
tig00003187_pilon	60416	18.7	8.81	-1.45	2	59956
tig00003206_pilon	122869	14.01	4.07	-1.42	1	102187
tig00003207_pilon	38656	16.65	5.85	-1.45	1	38623
tig00003258_pilon	60554	11.04	4.76	-1.4	1	60515
tig00003271_pilon	55840	14.96	6.71	-1.14	1	55092
tig00003277_pilon	77811	17.44	6.53	-1.41	1	77441
tig00003289_pilon	38282	12.82	0	-Inf	1	37520
tig00003315_pilon	33853	9.8	3.84	-1.35	1	33759
tig00003357_pilon	41955	23.23	2.97	-2.66	2	41647
tig00003364_pilon	35084	14.38	5.45	-1.46	1	35062
tig00003382_pilon	37985	19.03	5.49	-1.68	2	35537
tig00003399_pilon	62435	12.27	5.4	-1.31	1	48370
tig00003556_pilon	36577	6.83	2.58	-1.44	1	36550
tig00004918_pilon	35237	18.75	0	-Inf	2	34815
tig00005236_pilon	40563	27.9	0.35	-4.9	2	40375
tig00005386_pilon	31279	19.39	7.17	-1.34	2	31266
tig00005772_pilon	38115	8.22	1.96	-1.94	1	36407
tig00006341_pilon	70084	16.84	0.01	-6.55	1	60524
tig00006347_pilon	1009159	13.01	2.91	-2.09	1	776930
tig00006350_pilon	899377	20.53	6.44	-1.51	2	792226
tig00006351_pilon	566345	10.23	3.11	-1.56	1	478693
tig00006352_pilon	46930	8.31	2.96	-1.55	1	46314
tig00006355_pilon	318731	17.16	4.98	-1.52	1	295122
tig00006360_pilon	92292	9.48	3.21	-1.25	1	81448
tig00006372_pilon	85125	7.77	1.63	-2.04	1	75797
tig00006373_pilon	449380	9.02	2.27	-1.71	1	402886
tig00006383_pilon	421980	13.86	2.65	-2.28	1	333846
tig00006384_pilon	337239	19.47	5.42	-1.65	2	273395
tig00006390_pilon	777619	12.77	4.62	-1.5	1	709457
tig00006392_pilon	129317	1.52	0.47	-1.46	1	24515
tig00006394_pilon	160889	9.78	4.87	-0.8	1	153185
tig00006406_pilon	365189	12.98	4.39	-1.41	1	353429
tig00006412_pilon	69513	8.02	2.34	-1.86	1	62983
tig00006422_pilon	55614	16.68	7.46	-1.21	1	35171
tig00006428_pilon	52085	17.42	1.79	-3.5	1	51607
tig00006430_pilon	150543	19.75	7.39	-1.58	2	41783
tig00006431_pilon	809613	10.96	3.98	-1.37	1	757283
tig00006434_pilon	244873	10.29	3.75	-1.52	1	217398
tig00006436_pilon	81610	9.3	4.44	-1.07	1	72762
tig00006444_pilon	128373	19.84	6.29	-1.46	2	125465
tig00006447_pilon	74597	6.48	1.61	-1.71	1	51085
tig00006455_pilon	318407	12.31	3.06	-1.71	1	311731
tig00006460_pilon	283536	10.86	3.6	-1.56	1	255121
tig00006466_pilon	172571	15.92	1.04	-3.62	1	164661
tig00006467_pilon	87553	13.25	0.91	-3.9	1	87490
tig00006468_pilon	358969	12.83	6.15	-1.01	1	275877
tig00006469_pilon	84169	5.96	1.3	-1.38	1	78621
tig00006475_pilon	172605	18.05	3.29	-1.88	2	165754
tig00006479_pilon	98720	17	3.12	-1.44	1	98560
tig00006480_pilon	169678	9.56	4.01	-1.01	1	164726
tig00006481_pilon	63514	8.35	3.11	-2.16	1	63298
tig00006485_pilon	216374	11.05	4.39	-1.46	1	206668
tig00006493_pilon	112882	12.06	1.76	-1.56	1	78896
tig00006494_pilon	81000	14.57	1.83	-2.44	1	80804
tig00006498_pilon	181468	11.98	0.76	-3.31	1	129194
tig00006500_pilon	80151	16.27	3.8	-1.54	1	77628
tig00006502_pilon	220086	8.36	2.43	-1.47	1	198105
tig00006506_pilon	76529	17.89	6.53	-1.45	1	76486
tig00006512_pilon	81728	10.55	3.45	-1.61	1	73257
tig00006515_pilon	61317	6.57	0.48	-2.35	1	59105
tig00006522_pilon	88589	20.54	1.47	-3.57	2	87629
tig00006527_pilon	42419	13.79	3.28	-1.56	1	42339
tig00006528_pilon	78460	10.36	3.54	-1.56	1	74970
tig00006529_pilon	46715	7.77	1.01	-2.85	1	46497
tig00006530_pilon	24933	15.82	0.51	-4.99	1	24902
tig00006533_pilon	30575	6.98	1.98	-1.71	1	30433
tig00006534_pilon	26402	11.8	3.3	-1.45	1	26297
tig00006537_pilon	71972	40.09	0.14	-4.68	3	69088
tig00037959_pilon	133314	21.54	2.28	-3.49	2	132638
tig00037975_pilon	85353	18.46	6.69	-1.29	2	84901
tig00037979_pilon	158133	10.07	2.94	-1.53	1	143701
tig00037982_pilon	289206	21.62	9.28	-1.14	2	189532
tig00037985_pilon	41735	10.5	0.66	-2.84	1	40241
tig00037987_pilon	37545	9.39	0.49	-3.47	1	37293
tig00037990_pilon	20527	1.92	0.76	-1.35	1	2974
tig00038002_pilon	533348	18.7	4.95	-1.79	2	482436
tig00038004_pilon	36268	12.21	3.1	-1.88	1	36127
tig00038006_pilon	259820	9.75	3.24	-1.33	1	249372
tig00038012_pilon	72248	10.53	2.38	-1.74	1	69299
tig00038015_pilon	117113	19.57	4.79	-1.78	2	113318
tig00038017_pilon	62894	7.15	0.44	-3.22	1	62429
tig00038018_pilon	70090	10.43	4.77	-1.19	1	65131
tig00038020_pilon	123853	19.22	1.99	-2.77	2	120116
tig00038025_pilon	121088	7.78	1.73	-1.62	1	74808
tig00038031_pilon	108413	17.02	5.51	-1.39	1	108365
tig00038045_pilon	118549	9.11	1.91	-1.66	1	94861
tig00038047_pilon	41536	6.02	2.03	-1.41	1	8295
tig00038048_pilon	64052	9.81	2.15	-1.32	1	63932
tig00038052_pilon	47158	11.16	2.16	-1.52	1	46176
tig00038055_pilon	116102	7.74	2.39	-1.42	1	106088
tig00038058_pilon	83479	23.66	8.53	-1.36	2	83441
tig00038063_pilon	42351	21.76	0.46	-4.56	2	41618
tig00038065_pilon	35991	8.64	0.35	-4.43	1	35686
tig00038068_pilon	36736	21.78	0.16	-7.3	2	36593
tig00038080_pilon	37944	14.54	5.11	-1.53	1	27079
tig00038083_pilon	38575	15.76	6.05	-1.41	1	38528
tig00038096_pilon	217319	10.51	2.7	-1.66	1	197187
tig00038098_pilon	140294	8.8	3.1	-1.36	1	131987

## Sheet: Table S10
Table S10. Contigs, their length, bp repeats masked, and M and F and inferred coverage ratio in YL assembly.
Contig	Length	Male Cov.	Female Cov.	Log2(Female/Male)	Copy Number	Masked (bp)
000005F_pilon	2592044	10	1.39	-2.7	1	2198229
000006F_pilon	1648969	9.11	1.73	-2.21	1	1424075
000010F_pilon	1563104	11.09	3.01	-1.6	1	1406534
000011F_pilon	3351422	9.69	2.38	-1.8	1	3038014
000012F_pilon	1420331	9.97	1.05	-3.15	1	1147704
000014F_pilon	1200401	9.73	2.75	-1.65	1	1109893
000015F_pilon	1982054	9.51	2.43	-1.78	1	1633069
000037F_pilon	548194	9.33	1.68	-2.32	1	501258
000042F_pilon	503240	9.91	1.48	-2.61	1	367606
000045F_pilon	816342	11.42	4.19	-1.27	1	755046
000048F_pilon	451959	24.48	8.84	-1.47	2	450861
000053F_pilon	911661	10.1	1.9	-2.22	1	779739
000058F_pilon	900917	8.82	1.05	-3.05	1	669729
000059F_pilon	404781	10.29	1.02	-3.28	1	250945
000060F_pilon	542665	8.92	0.47	-4.19	1	510062
000063F_pilon	609973	9.71	1.28	-2.74	1	521705
000064F_pilon	379135	9.54	3.61	-1.21	1	366424
000068F_pilon	1331247	9.65	1.87	-2.18	1	1224298
000073F_pilon	482370	10.66	0.83	-3.7	1	370053
000074F_pilon	377702	9.44	1.19	-3.19	1	311755
000077F_pilon	335848	10.96	0.85	-3.51	1	280657
000078F_pilon	354427	10.55	1.6	-2.56	1	237371
000079F_pilon	327961	8.32	0.91	-3.28	1	226131
000081F_pilon	336668	8.12	1.21	-2.56	1	306312
000083F_pilon	1303374	9.52	0.94	-2.83	1	1021404
000085F_pilon	299838	8.64	1.34	-2.43	1	291941
000093F_pilon	268752	10.48	0.85	-3.19	1	239394
000097F_pilon	261656	5.93	0.57	-2.88	1	246216
000098F_pilon	278028	8.33	0.79	-3.19	1	265678
000101F_pilon	273022	9.19	1.18	-2.74	1	246549
000112F_pilon	812288	10.61	0.48	-4.16	1	803477
000114F_pilon	514009	8.59	2.22	-1.67	1	500049
000118F_pilon	263537	8.09	0.49	-3.74	1	235925
000123F_pilon	227200	8.73	0.94	-2.73	1	213914
000125F_pilon	335447	7.93	1.46	-2.22	1	300869
000126F_pilon	215873	9.88	0.93	-3.11	1	214043
000131F_pilon	203890	8.14	0.48	-4.14	1	148492
000132F_pilon	579595	9.81	0.99	-3.18	1	520549
000136F_pilon	194175	7.83	0.26	-4.69	1	184624
000138F_pilon	215000	7.75	0.57	-3.56	1	211307
000139F_pilon	183953	11.11	2.38	-1.98	1	149213
000142F_pilon	267487	7.85	0.83	-3.42	1	204297
000143F_pilon	218895	8.49	4.08	-1.07	1	209212
000144F_pilon	326142	8.26	0.52	-3.57	1	287940
000154F_pilon	231781	7.92	1.55	-2.16	1	195562
000155F_pilon	157092	10.18	1.17	-2.96	1	132351
000160F_pilon	189547	7.55	0.81	-3.46	1	137799
000161F_pilon	189776	9.57	1.17	-2.93	1	188430
000163F_pilon	180489	6.56	1.04	-2.29	1	174418
000166F_pilon	152958	33.35	11.79	-1.44	3	129522
000167F_pilon	142078	9.43	1.64	-3.03	1	140846
000180F_pilon	161059	8.03	0.72	-3.35	1	136101
000198F_pilon	1515852	11.21	1.21	-3.01	1	1350364
000200F_pilon	188034	15.57	0.81	-3.8	2	145775
000216F_pilon	114741	11.23	1.94	-1.78	1	109822
000220F_pilon	141954	7.1	1.6	-2.05	1	137613
000235F_pilon	152107	8.83	0.25	-4.87	1	120344
000244F_pilon	164230	10.5	0.34	-4.85	1	163631
000254F_pilon	127051	14.74	0.26	-5.23	1	117570
000297F_pilon	161440	8.83	0.42	-3.58	1	124541
000310F_pilon	82502	7.01	0.55	-2.9	1	78057
000438F_pilon	67866	9.63	0.34	-4.74	1	66710
tig00000017_pilon	139541	10.53	0.69	-3.8	1	138058
tig00000020_pilon	407740	10.77	0.33	-5.13	1	387993
tig00000023_pilon	94099	12.67	0.03	-8.19	1	93888
tig00000025_pilon	115717	8.2	0	-Inf	1	115033
tig00000030_pilon	186167	10.21	0.02	-10.13	1	184326
tig00000054_pilon	157959	9.11	1.25	-2.58	1	154983
tig00000064_pilon	146934	7.67	1.19	-2.77	1	107271
tig00000079_pilon	58165	6.28	0.57	-2.95	1	41030
tig00000080_pilon	52410	6.94	0.81	-2.69	1	35035
tig00000105_pilon	104564	6.9	1.95	-1.29	1	100902
tig00000142_pilon	78017	9.33	0.91	-2.84	1	61799
tig00000145_pilon	78184	7.48	0.49	-3.11	1	76809
tig00000154_pilon	70523	8.77	0.18	-5.35	1	68281
tig00000155_pilon	85704	7.8	0.42	-4.2	1	84672
tig00000184_pilon	133204	11.98	0.76	-3.83	1	119032
tig00000194_pilon	212548	9.88	0.78	-2.34	1	188204
tig00000201_pilon	215439	10.42	0.87	-3.62	1	208714
tig00000232_pilon	87880	9.54	1.23	-2.67	1	85027
tig00000242_pilon	83270	15.47	6.55	-1.3	2	13240
tig00000245_pilon	60794	10.68	0.75	-3.71	1	37337
tig00000253_pilon	391689	9.04	1.77	-2.36	1	388528
tig00000258_pilon	62038	13.38	5.95	-1.15	1	10583
tig00000260_pilon	96514	37.27	0.03	-11.12	4	96200
tig00000261_pilon	50974	13.12	0	-Inf	1	41915
tig00000264_pilon	51826	58.03	0.02	-12.11	6	51514
tig00000310_pilon	177291	14.99	1.17	-3.4	1	130775
tig00000318_pilon	88063	13.09	0.13	-Inf	1	87269
tig00000353_pilon	104427	15.35	0.04	-8.98	2	84752
tig00000354_pilon	57221	36.72	0.02	-9.74	4	57042
tig00000362_pilon	73597	16.8	0	-Inf	2	73001
tig00000371_pilon	76659	18.52	0	-Inf	2	76412
tig00000376_pilon	242141	7.8	0.76	-3.24	1	240920
tig00000380_pilon	116698	8.38	1.45	-1.98	1	116416
tig00000383_pilon	220108	8.36	0.82	-3.08	1	151606
tig00000386_pilon	423437	7.69	0.81	-2.92	1	319242
tig00000405_pilon	59768	19.02	7.02	-1.3	2	9430
tig00000406_pilon	71855	6.89	1.23	-1.81	1	49358
tig00000571_pilon	40516	8.77	0.49	-3.84	1	40380
tig00000580_pilon	168617	10.52	2.4	-1.7	1	165260
tig00000608_pilon	356790	8.85	1.16	-2.99	1	351569
tig00000616_pilon	542448	10.7	1.32	-2.47	1	532047
tig00000619_pilon	337116	11.06	0.43	-4.21	1	334102
tig00000625_pilon	1480853	10.17	4.24	-1.11	1	1333372
tig00000639_pilon	56858	6.12	0.22	-4	1	56624
tig00000640_pilon	316104	13.23	0.6	-3.81	1	252647
tig00000642_pilon	341715	8.99	0.79	-3.43	1	246779
tig00000645_pilon	32287	9.36	0.06	-7.52	1	32106
tig00000646_pilon	145617	8.81	0.05	-8.64	1	144969
tig00000647_pilon	523306	10.67	0.68	-3.83	1	502680
tig00000674_pilon	1445882	8.74	1.46	-2.33	1	1382305
tig00000676_pilon	918914	19.25	7.13	-1.57	2	840817
tig00000682_pilon	1055918	9.97	0.78	-3.59	1	896018
tig00000683_pilon	402603	8.37	1.38	-2.48	1	340980
tig00000686_pilon	527170	10.35	0.73	-3.3	1	523899
tig00000688_pilon	253541	12.16	0	-Inf	1	249466
tig00000690_pilon	1351039	11.01	0.95	-3.53	1	1060203
tig00000720_pilon	68759	12.56	0.33	-4.58	1	67610
tig00000746_pilon	192962	9.03	0.61	-3.67	1	178720
tig00000749_pilon	87477	10.41	1.82	-2.07	1	84526
tig00000750_pilon	402975	9.98	1.44	-2.72	1	370439
tig00000753_pilon	39371	7.88	0.54	-3.76	1	38437
tig00000766_pilon	78108	12.15	0.25	-4.63	1	66133
tig00000768_pilon	120729	8.1	2.75	-1.44	1	119418
tig00000771_pilon	1021014	11.7	3.9	-1.45	1	876109
tig00000783_pilon	127322	23.66	13.27	-1.1	2	46545
tig00000787_pilon	196327	13.77	6.34	-1.26	1	46199
tig00000801_pilon	52457	7.54	0.87	-3.44	1	35504
tig00000808_pilon	44001	6.63	1.31	-2.34	1	43828
tig00000809_pilon	393744	10.9	0.28	-4.76	1	392189
tig00000811_pilon	666670	25.35	10.56	-1.41	3	657143
tig00000813_pilon	146438	9.79	0.97	-3.16	1	145157
tig00000836_pilon	214123	6.92	3.42	-1.12	1	31871
tig00000843_pilon	366968	9.95	0.58	-3.77	1	312184
tig00000875_pilon	449123	8.66	1.11	-2.63	1	431063
tig00000889_pilon	157986	12.91	0.66	-4.16	1	151208
tig00000898_pilon	198019	12.4	1.06	-3.32	1	145649
tig00008195_pilon	45953	15.48	6.35	-1.43	2	45926

[truncated: 8 more sheets: Table S11, Table S12, Table S13, Table S14, Table S15, Table S16, Table S17, Table S18]
