# Supplementary material for: Transposable element accumulation drives size differences among polymorphic Y Chromosomes in Drosophila
Source: HighWire-hosted journal article supplement (doi:10.1101/gr.275996.121), 2022-05-02
Supplement: SupplementaryFigures.pdf [file SupplementaryFigures.pdf]

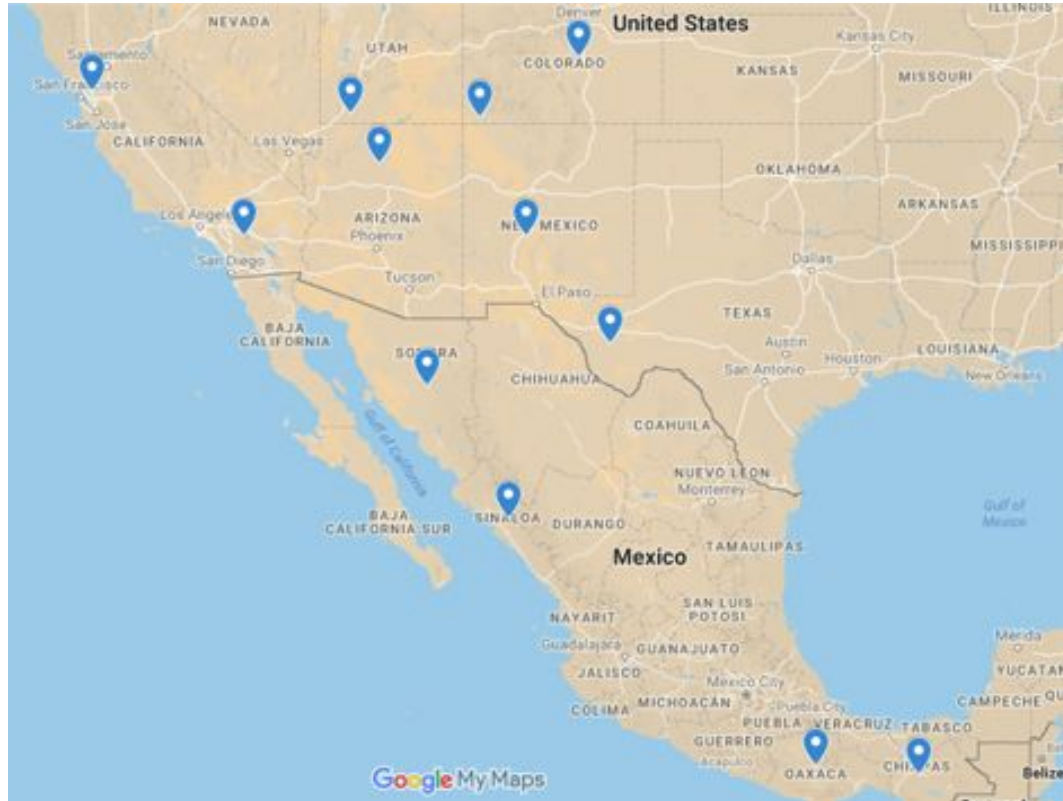

**Figure S1.** Geographic locations of sampled *D. pseudoobscura* Y chromosomes. See Table S1 for more information.

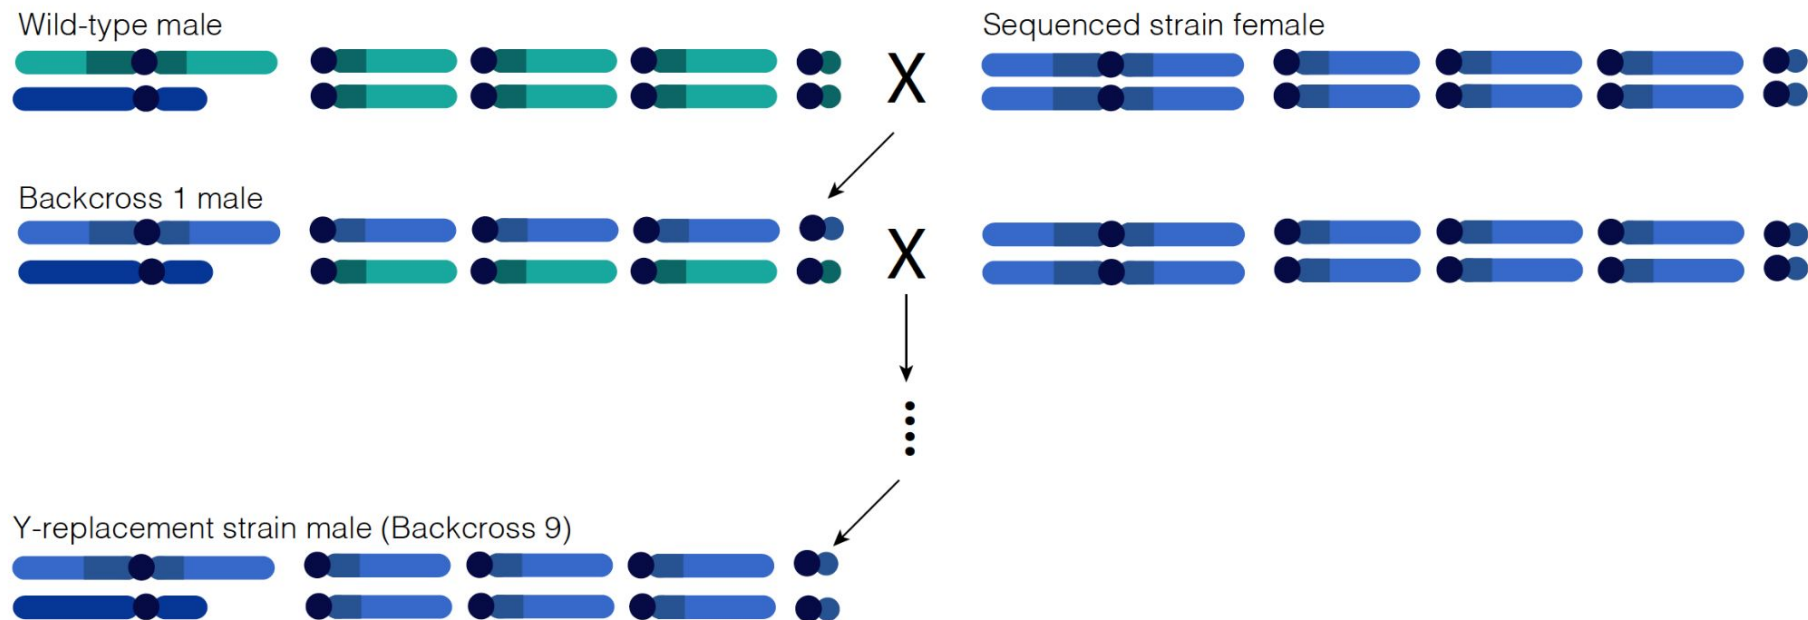

**Figure S2.** Backcrossing scheme to generate Y-replacement lines using wild-type males and the sequenced strain female (backcross strain).

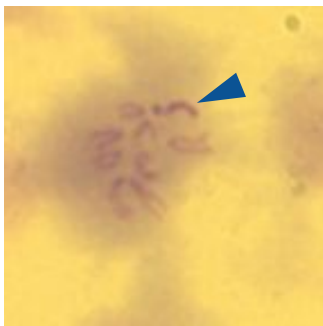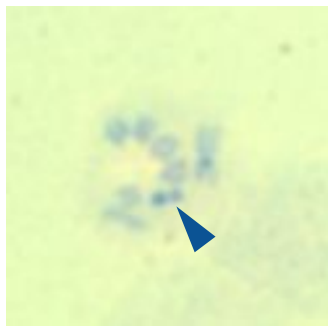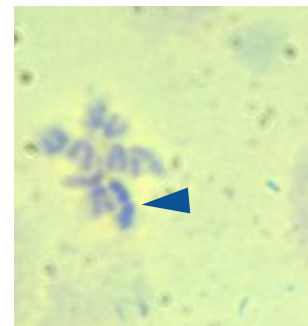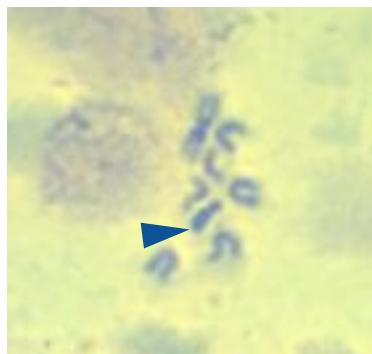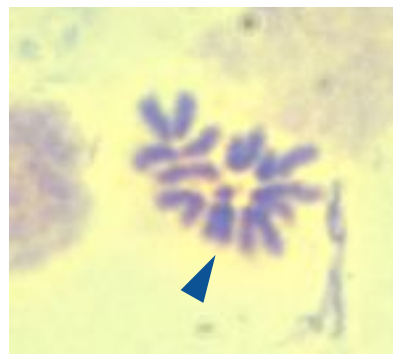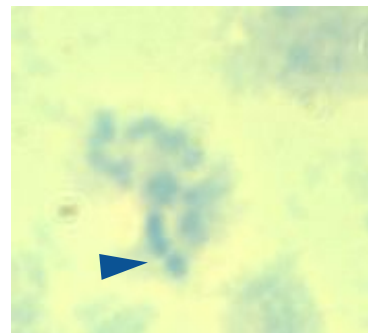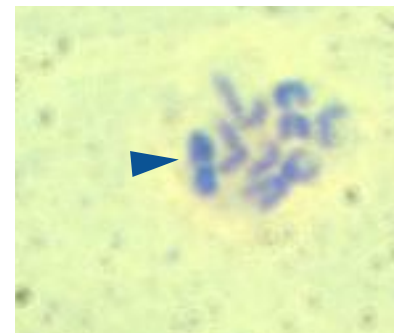

**Figure S3.** Representative chromosome squashes of Y-replacement line males. Top shows example images of Y chromosome morphology and bottom shows the Y chromosomes with varying sizes.

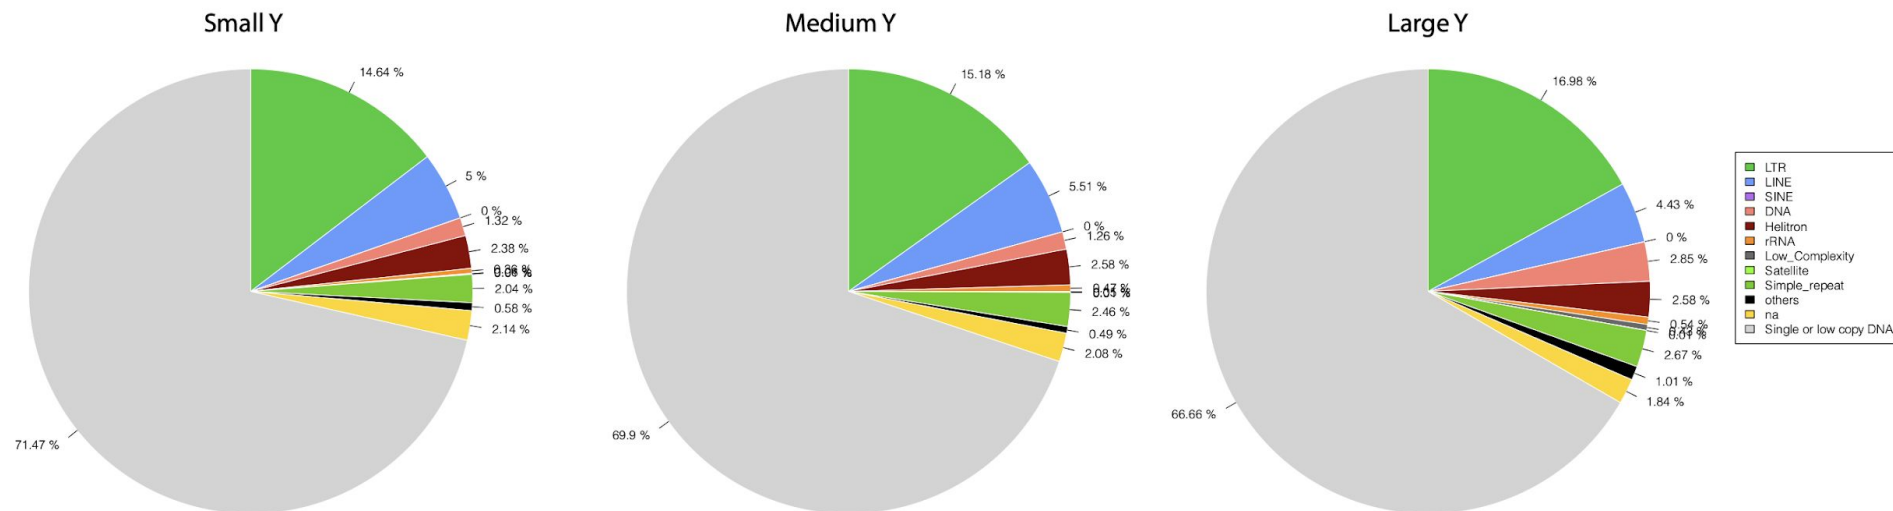

**Figure S4.** Reference-free based TE and single-copy (euchromatin) estimates for  $Y_S$ ,  $Y_M$ , and  $Y_L$  calculated from DNAPipeTE. Grey area denotes % of sample containing single-copy, i.e. euchromatin, DNA with the remaining denoting repetitive content.

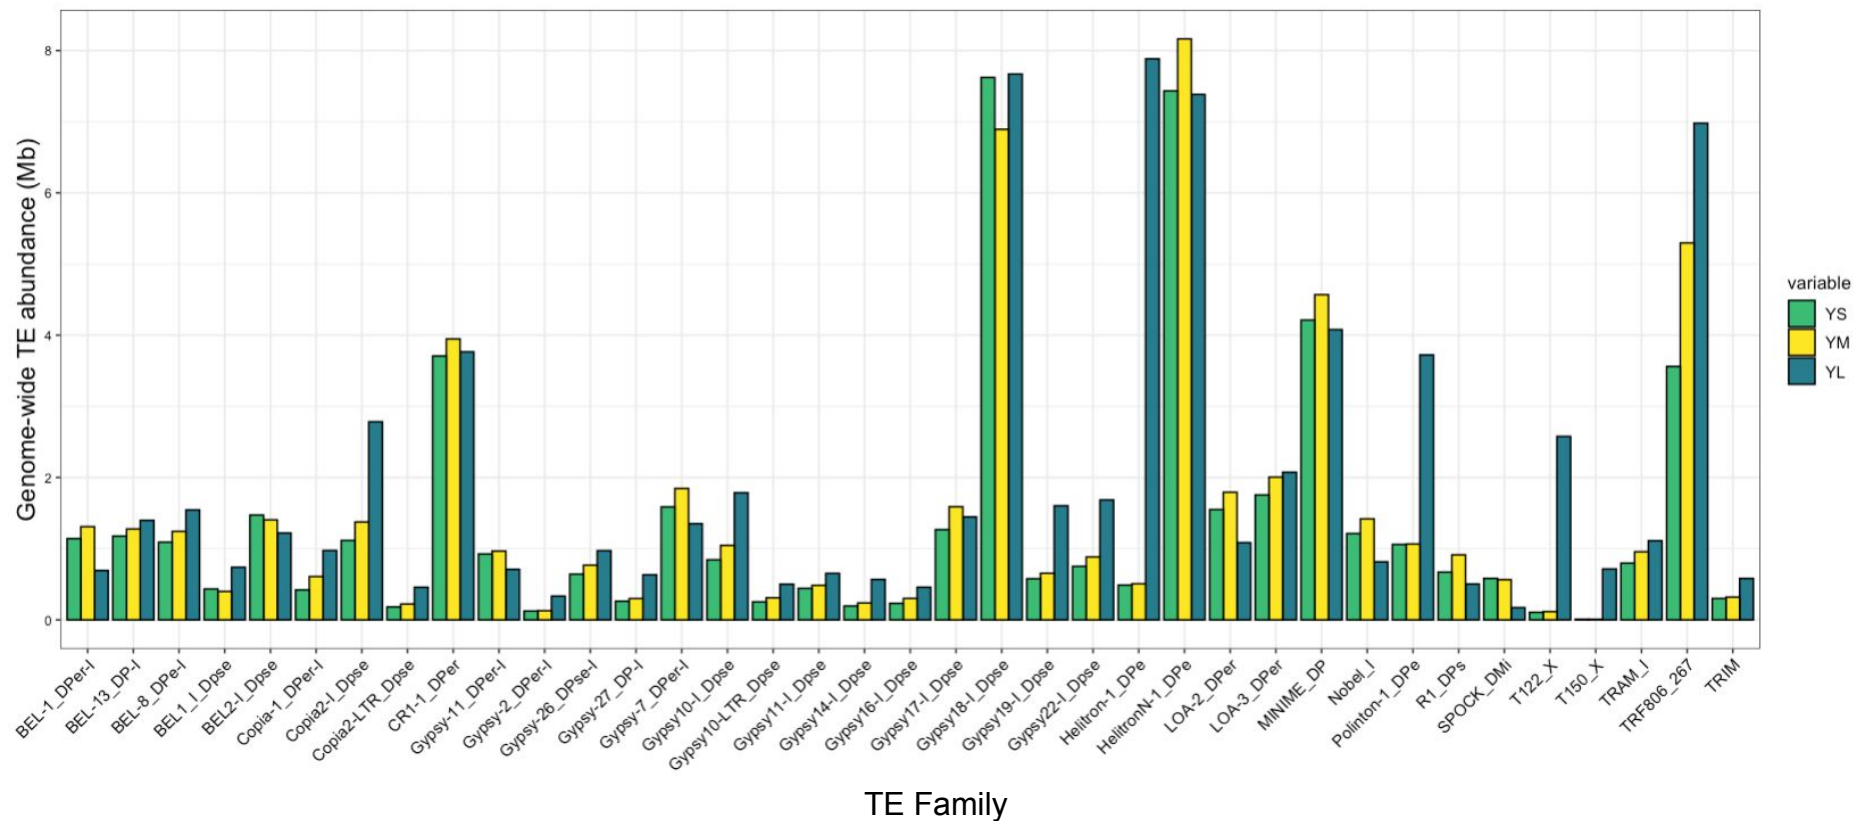

**Figure S5.** Total TE abundance for  $Y_S$ ,  $Y_M$ , and  $Y_L$  males as derived from Illumina mapping. Data underlying figures is contained in Table S11. Note these are absolute amounts compared to relative amounts which are plotted in Figure 3A.

Small Y

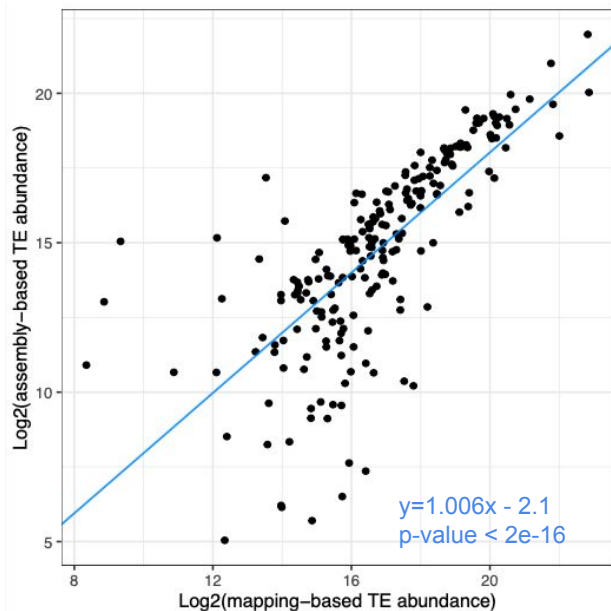

Medium Y

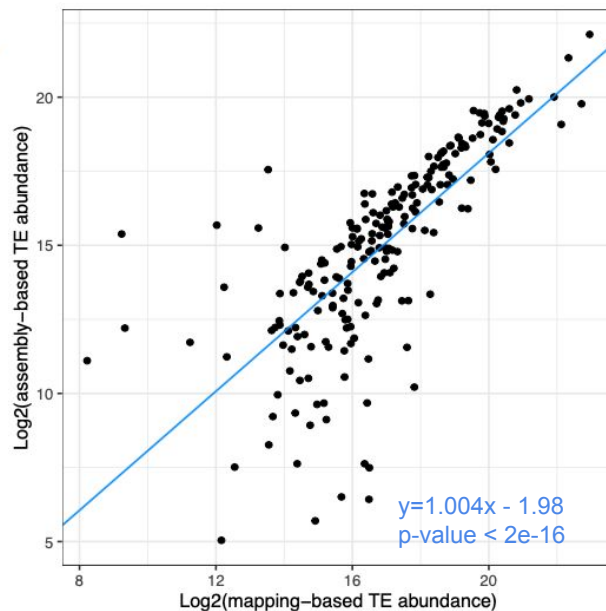

Large Y

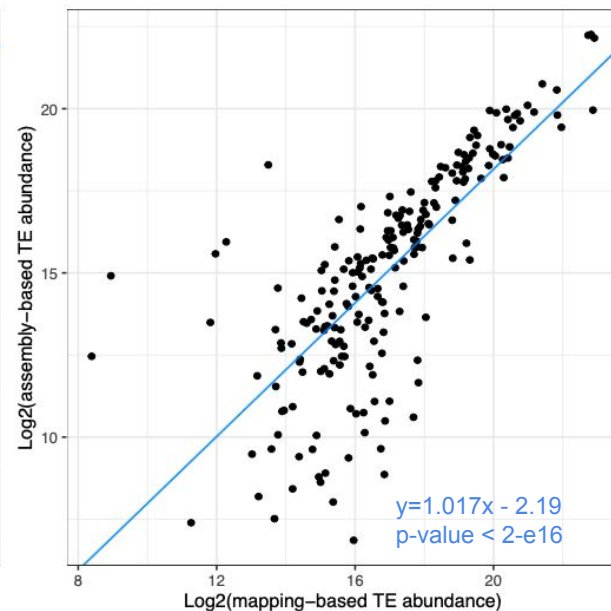

**Figure S6.** Correlation between Illumina mapping (X-axis) and de novo assembly (Y-axis). TE abundances for  $Y_s$  (left),  $Y_M$  (middle), and  $Y_L$  (right). For each plot, each data point represents a TE family and its respective abundance calculated from Illumina mappings and repeat-masked Y chromosome assemblies. Data underlying these figures are contained in Table S11 and Table S12.

A.

Coverage normalized by autosomes

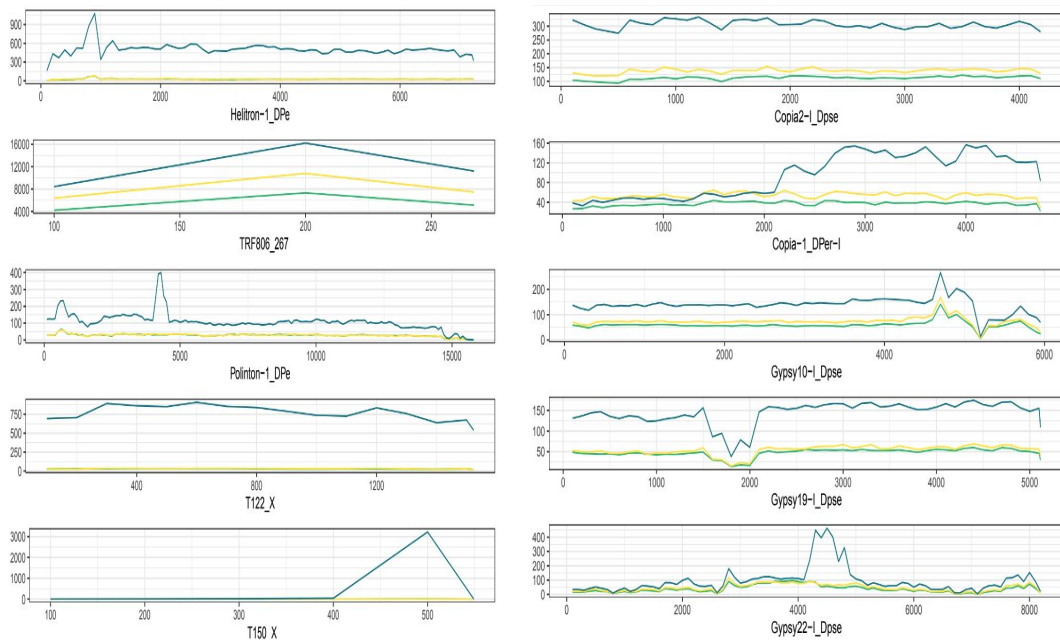

$Y_S$  male  
 $Y_M$  male  
 $Y_L$  male

B.

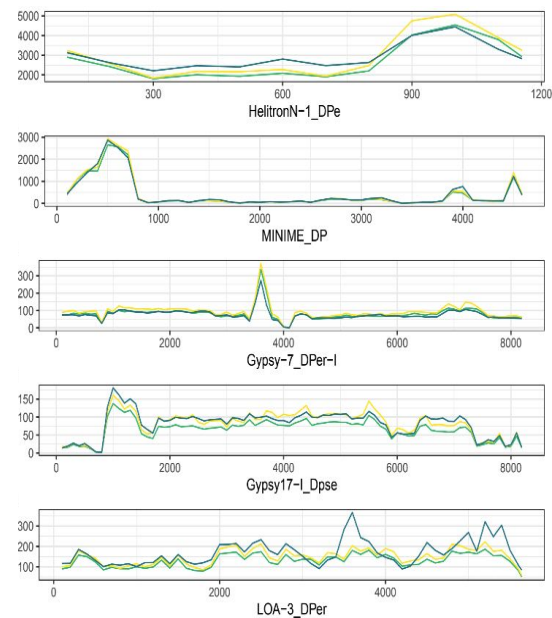

**Figure S7.** The most abundant transposons in  $Y_L$  from Illumina mappings for (A)  $Y_L$  and (B)  $Y_M$  and their coverage from  $Y_S$ ,  $Y_M$ , and  $Y_L$  genomic DNA.



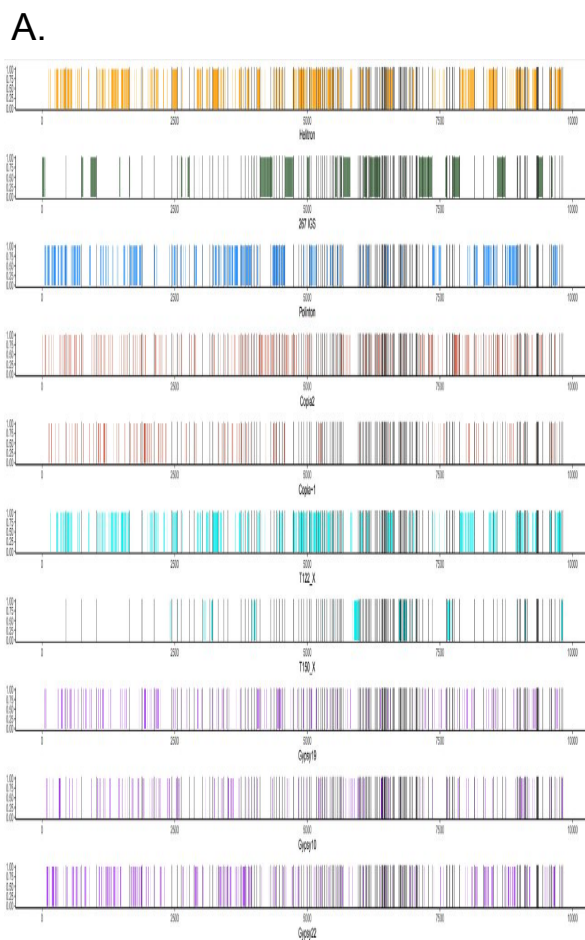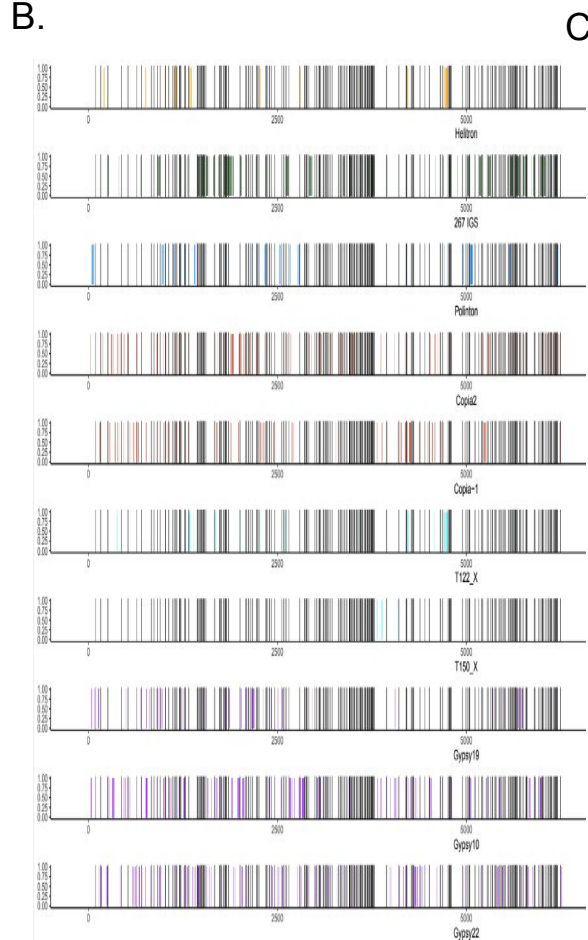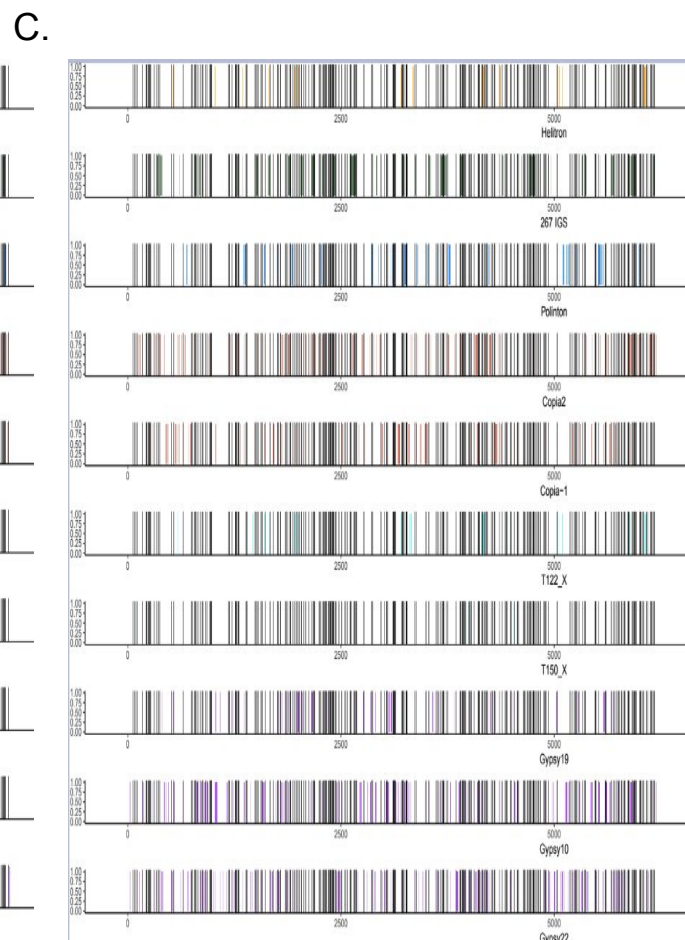

**Figure S8 (A-C).** TE distribution on Y-linked scaffolds for (A)  $Y_L$ , (B)  $Y_M$ , and (C)  $Y_S$  for the most abundant TEs in YL. One X-axis tick corresponds to a 1-5kb window whereas the Y-axis is mainly used for plotting the absence/presence of a TE. Note that assemblies are not adjusted for contig coverage in this figure.



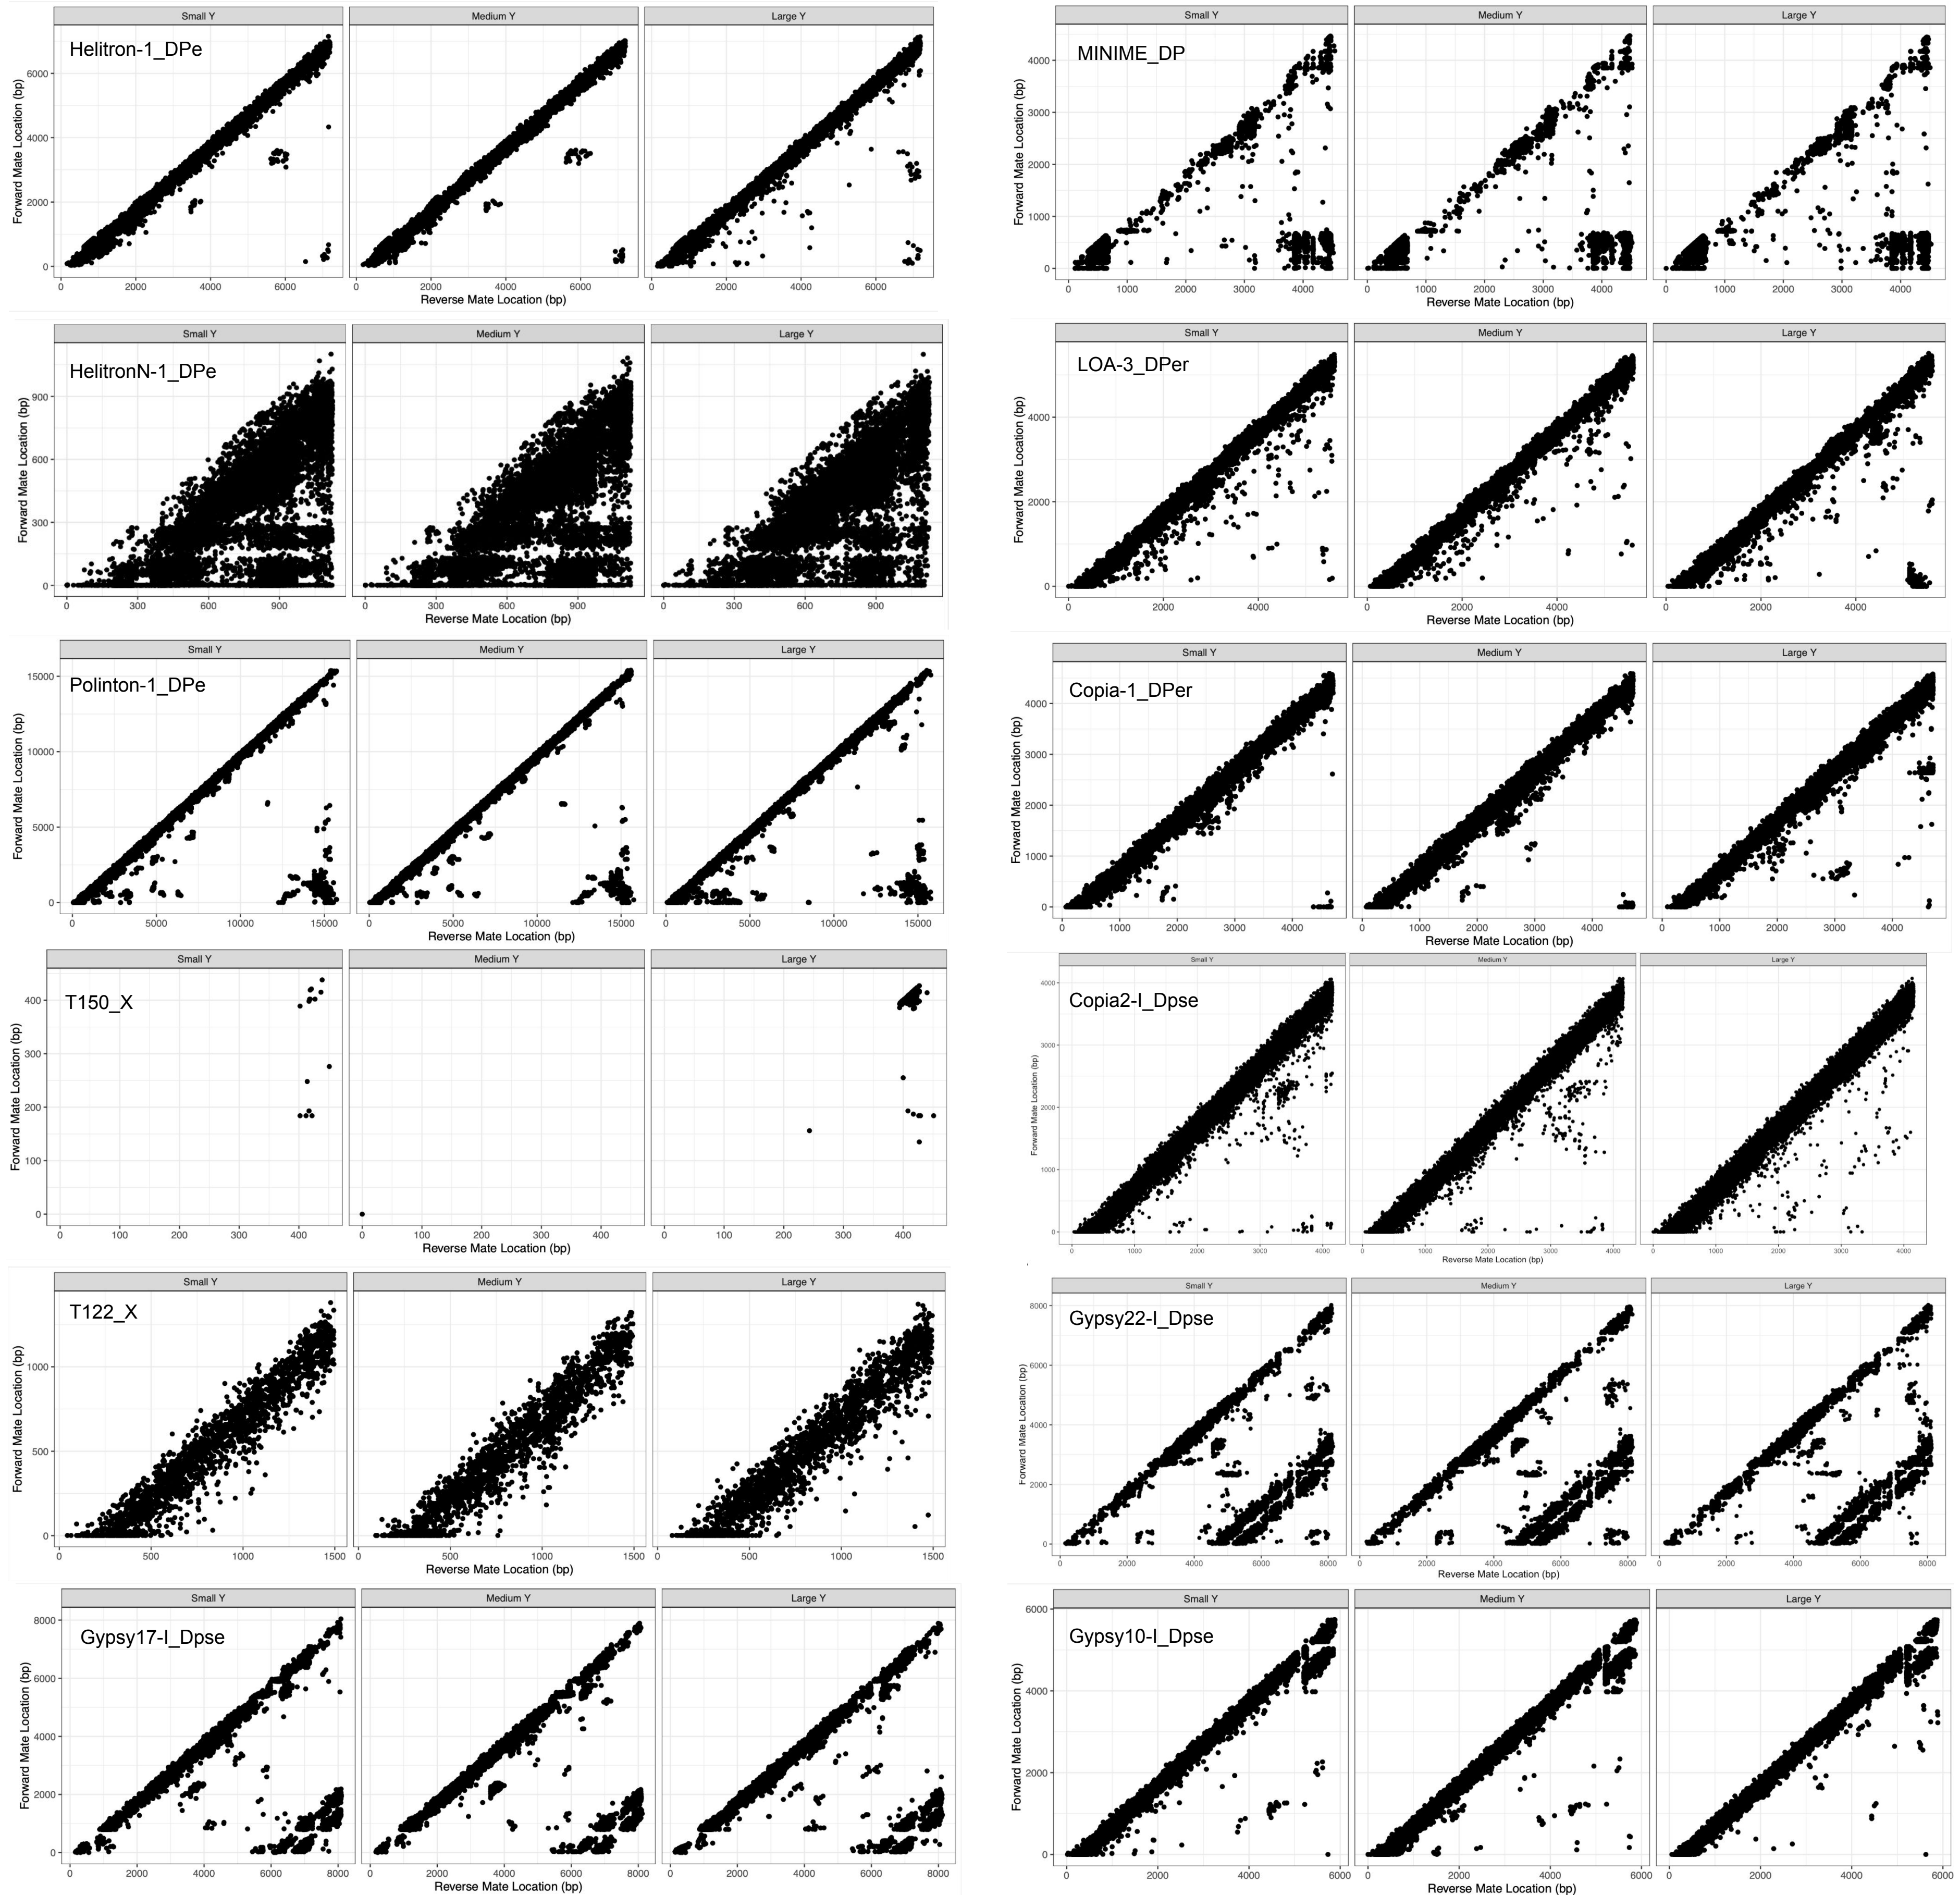

**Figure S9.** Inferring tandemly repeated TEs using violations of forward and reverse mapping coordinates for a subset of TEs in  $Y_S$ ,  $Y_M$ , and  $Y_L$  genomic DNA. Each group of plots corresponds to mapping coordinates of a particular TE for  $Y_S$  (left),  $Y_M$  (middle), and  $Y_L$  (right); the name of the TE is shown in the top-left corner of the  $Y_S$  plot. TEs that have head-to-tail tandems will have clusters of reads in the bottom right corner. For each TE, reads are downsampled to the smallest Y chromosome sample with the exception of T150\_X where  $Y_M$  has no reads.

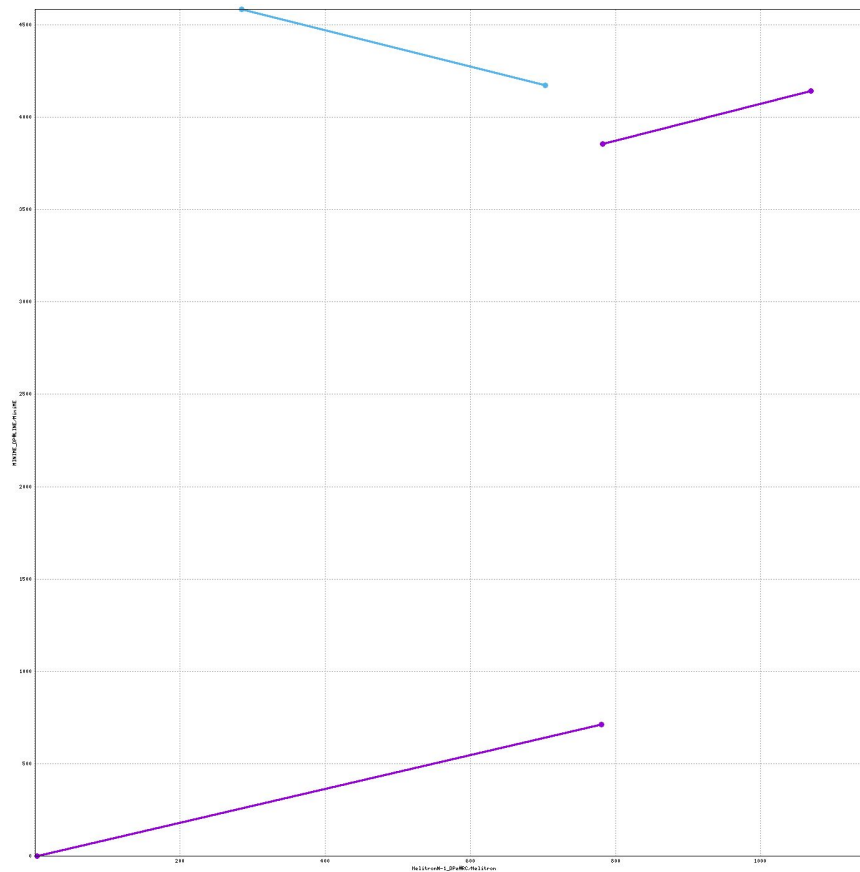

**Figure S10.** Alignment of HelitronN-1\_DPe (X-axis) to MINIME\_DP (Y-axis) using nucmer.

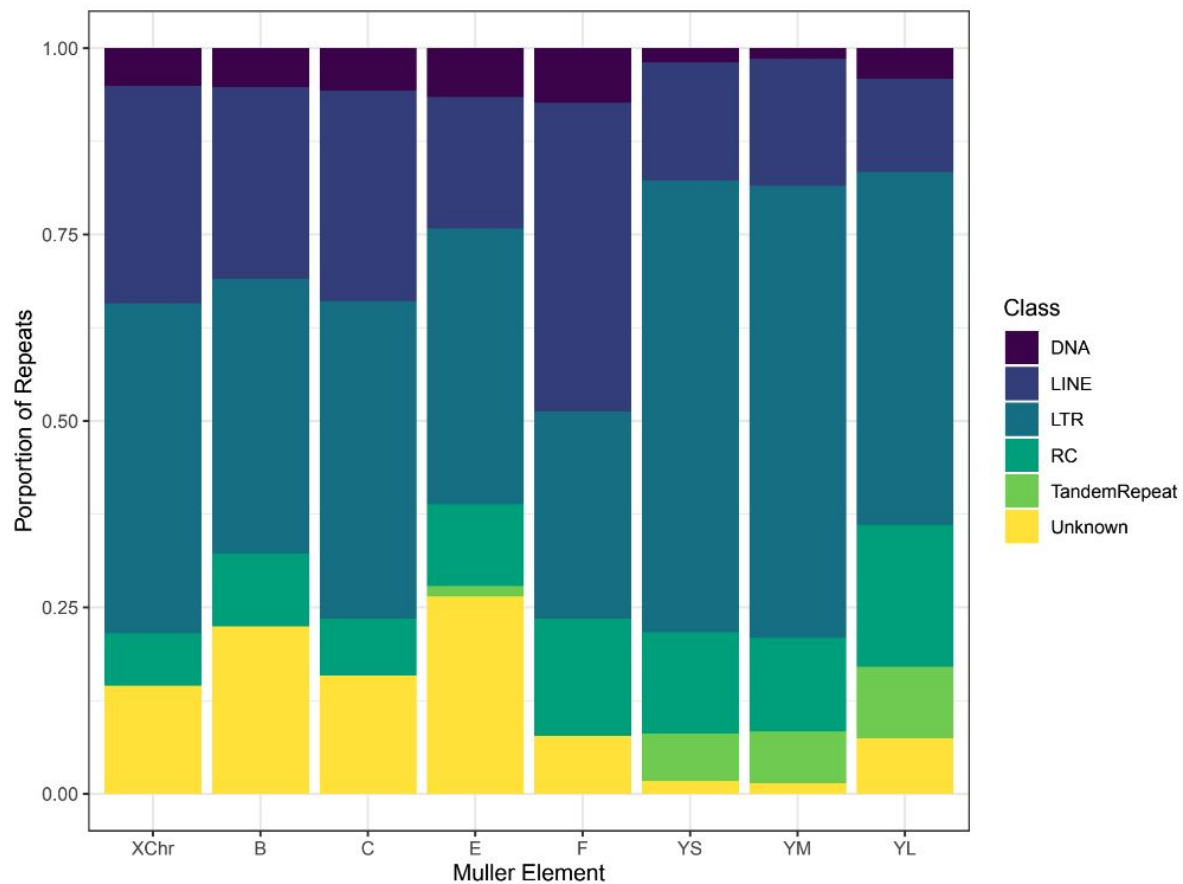

**Figure S11.** Repeat composition on a per chromosome basis. Shown is the repeat content for the autosomes, X, and the 3 different Y chromosomes from RepeatMasker.

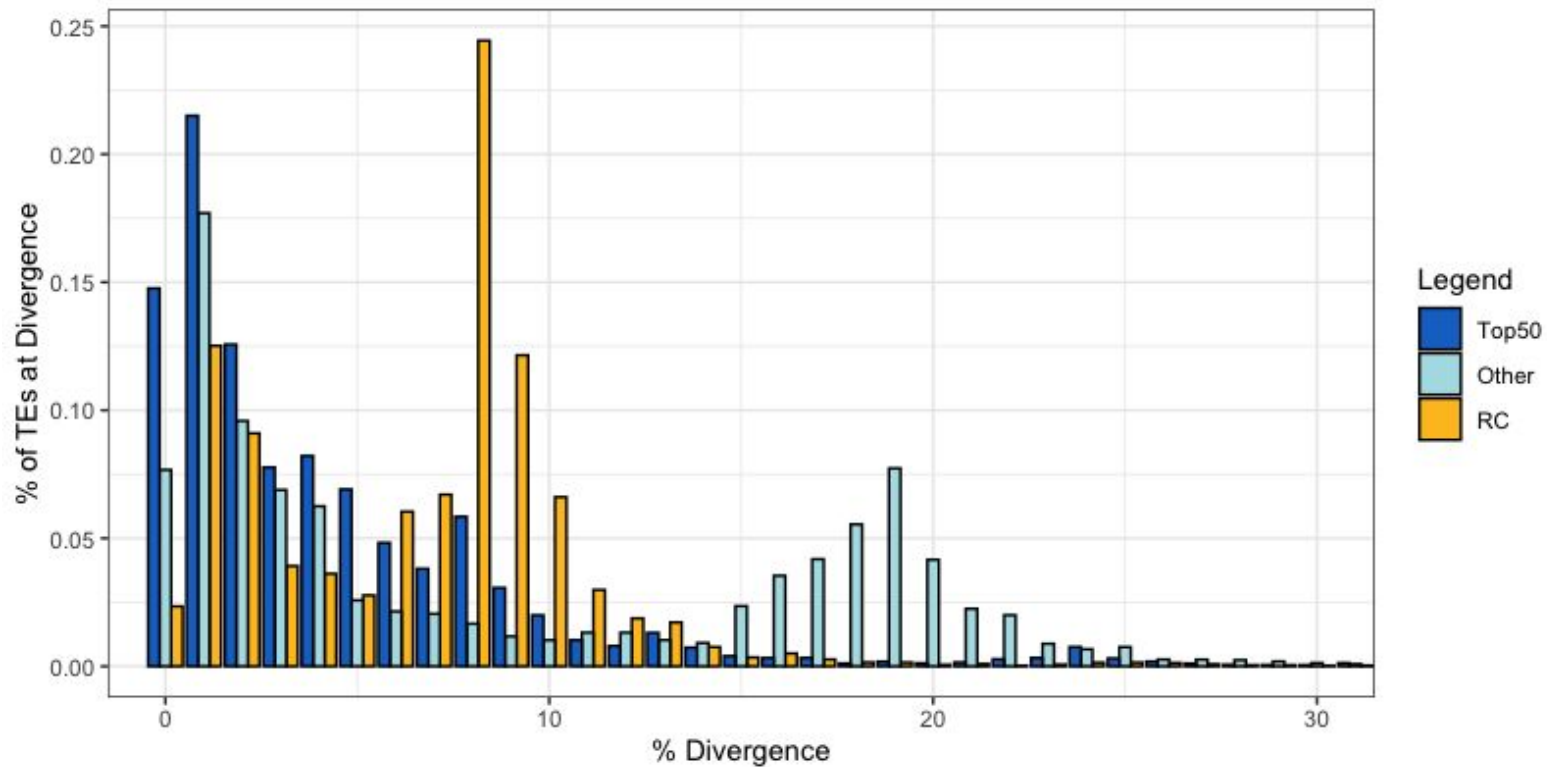

**Figure S12.** Divergence of abundant/non-abundant TEs on  $Y_M$  relative  $Y_S$ . The categories are analogous to the ones described in Figure 3D.

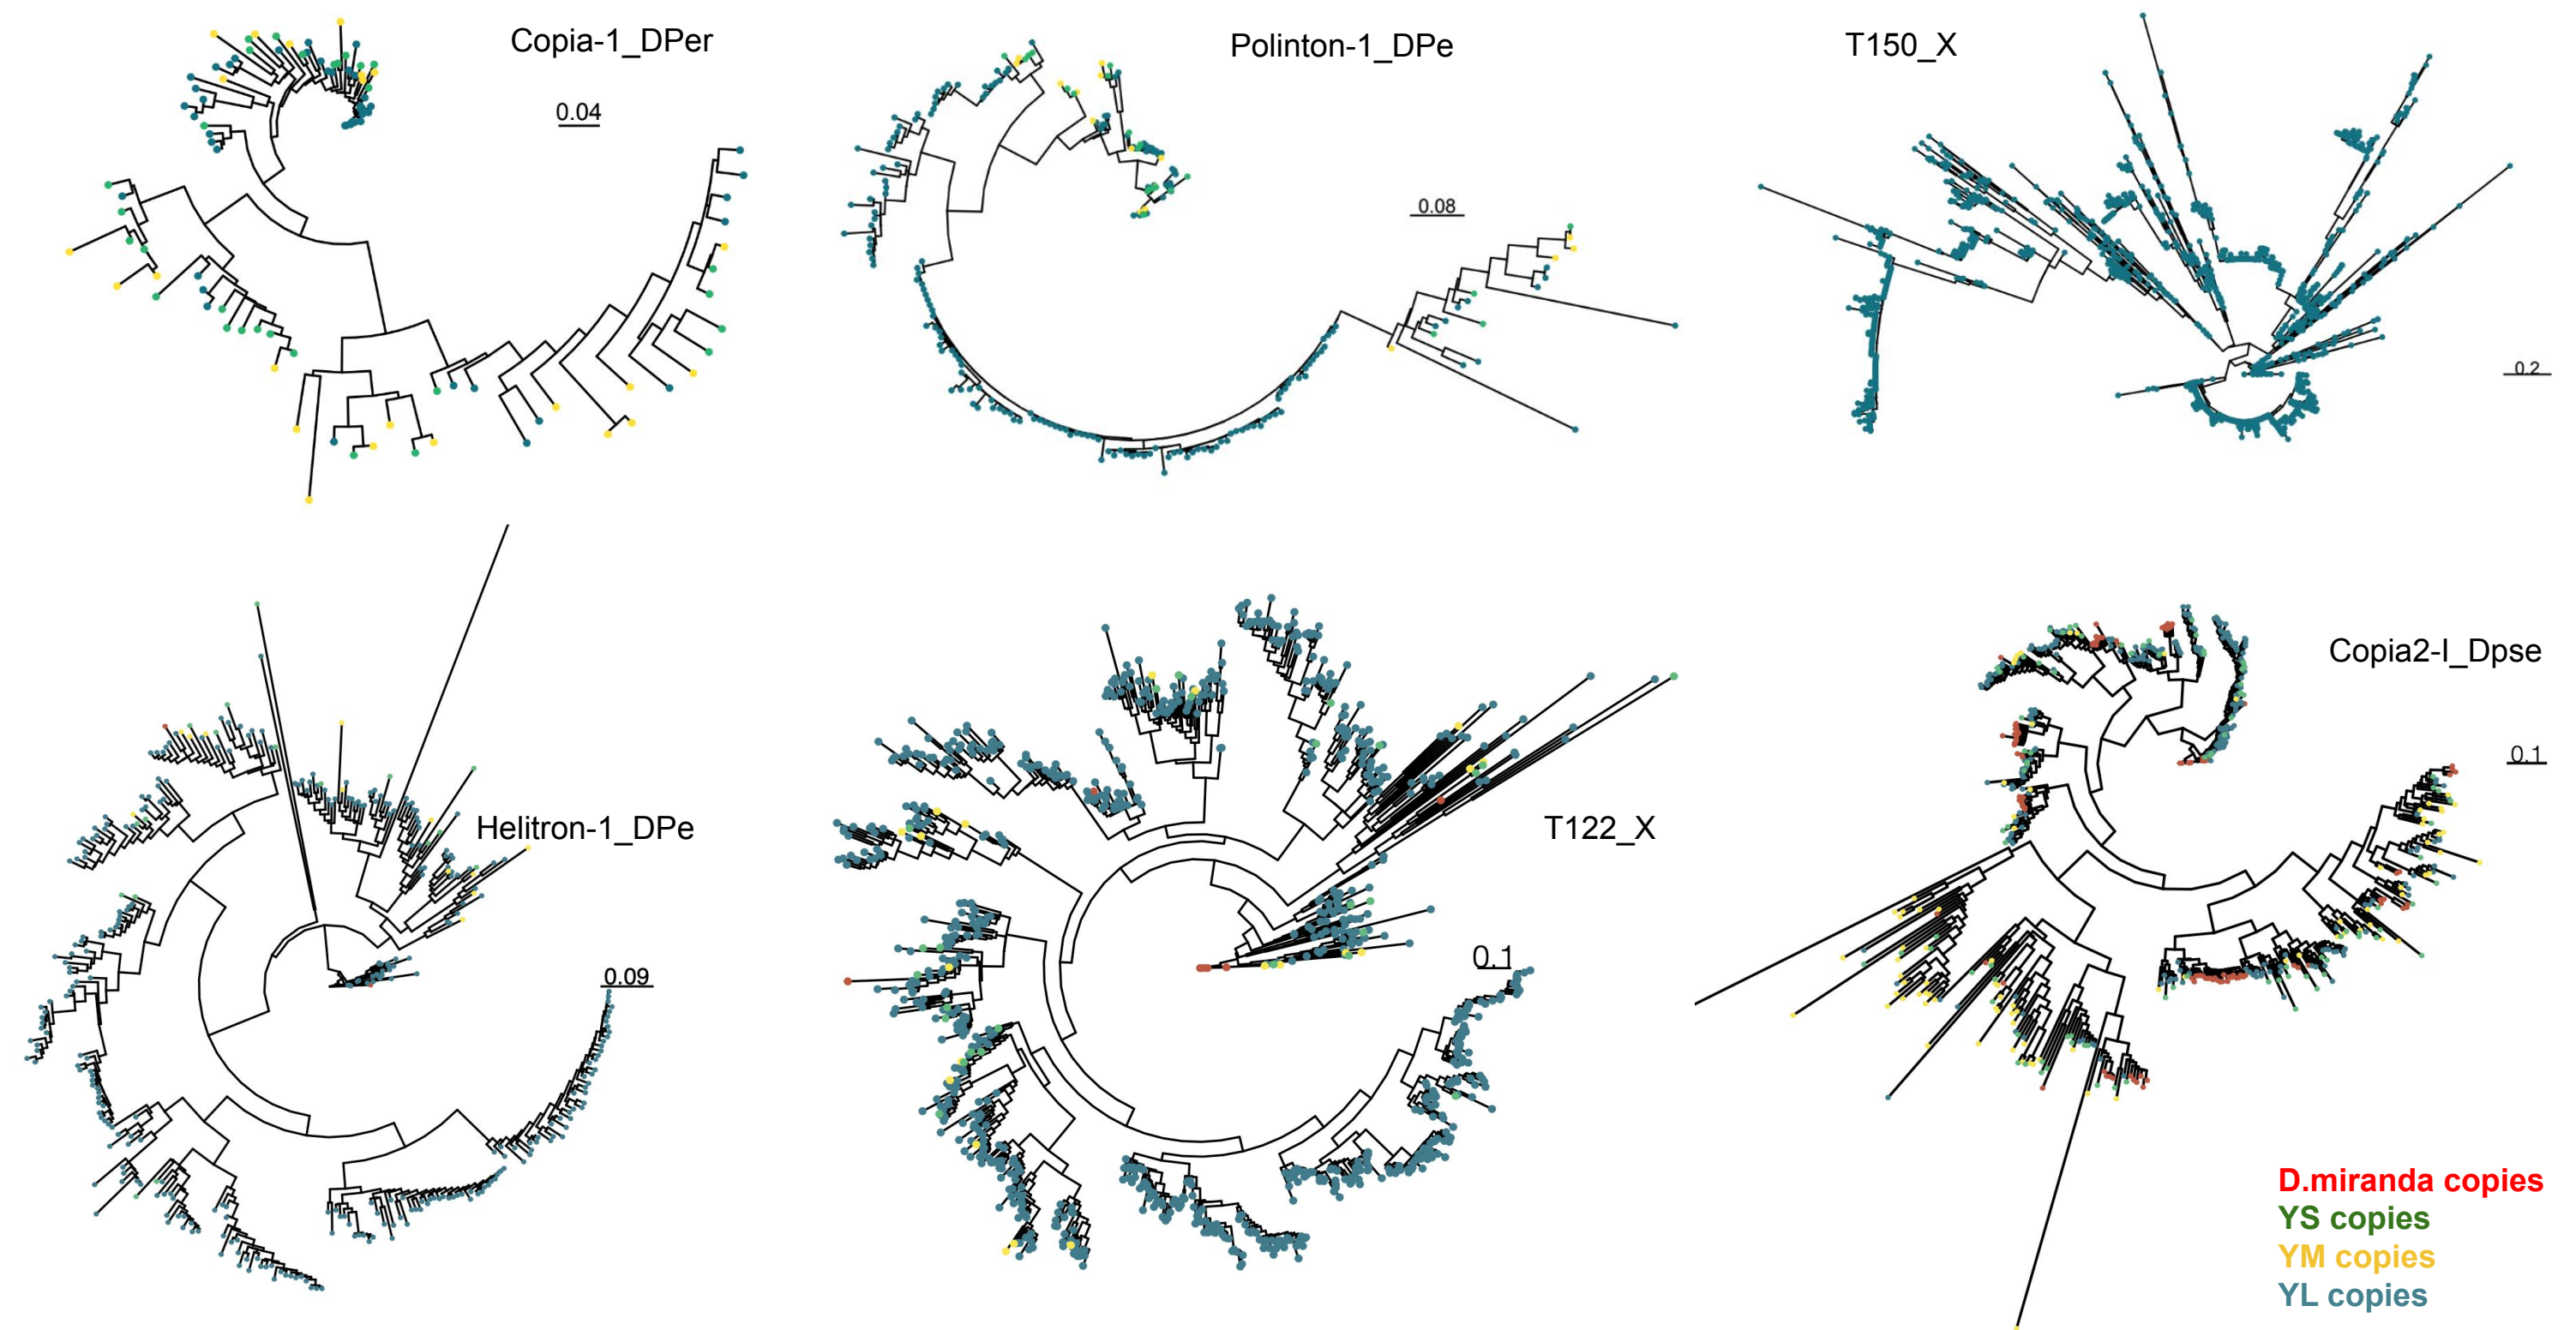

**Figure S13.** Unrooted phylogenies of TE copies found in  $Y_S$ ,  $Y_M$ ,  $Y_L$  assemblies. *D. miranda* copies are identified for Copia2-I\_Dpse, T122\_X, and Helitron-1\_DPe.



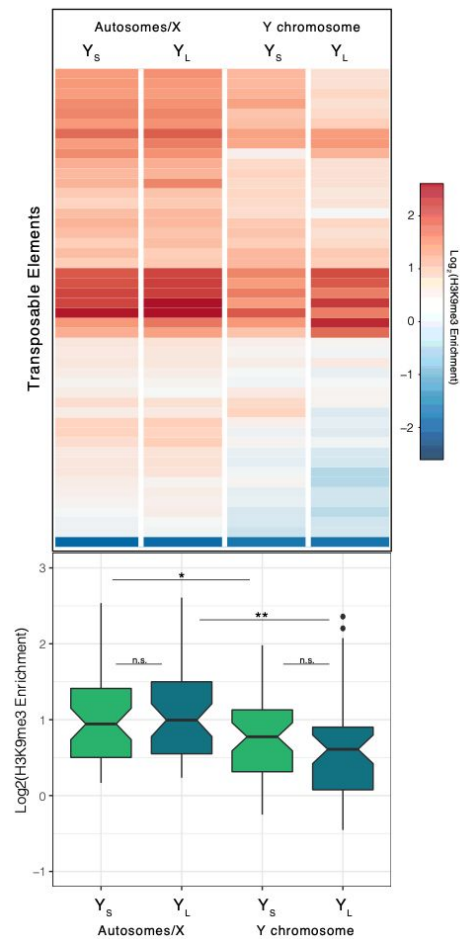

**Figure S14.** H3K9me3 enrichment for TEs with 50% more copy number in either  $Y_S$  or  $Y_L$ . Top shows enrichment plotted in heatmap with each row corresponding to a TE and bottom shows the same data in boxplot form.

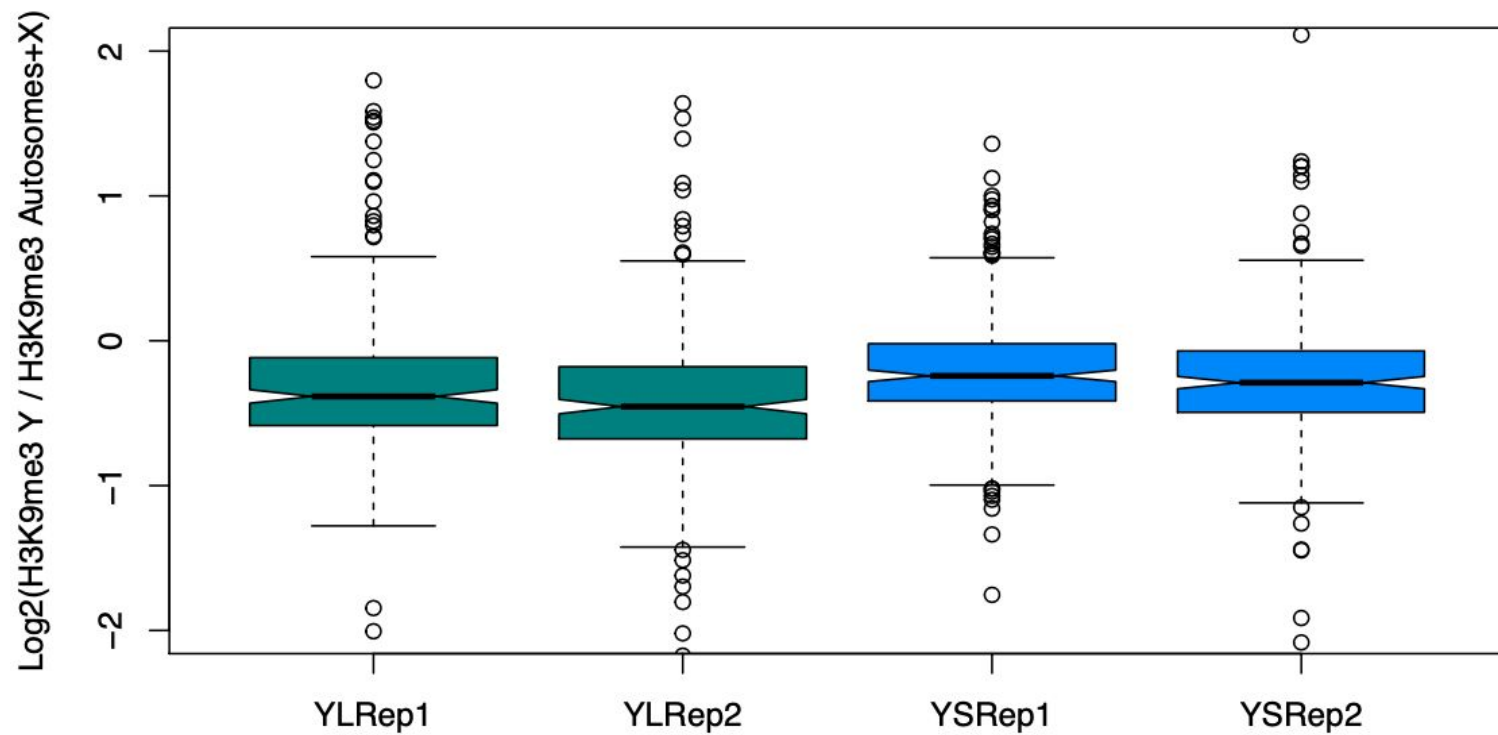

**Figure S15.**  $\text{Log2}(\text{H3K9me3 TE}_Y / \text{H3K9me3 TE}_{\text{Auto/X}})$  for all  $Y_S$  and  $Y_L$  ChIP replicates shown as boxplots.



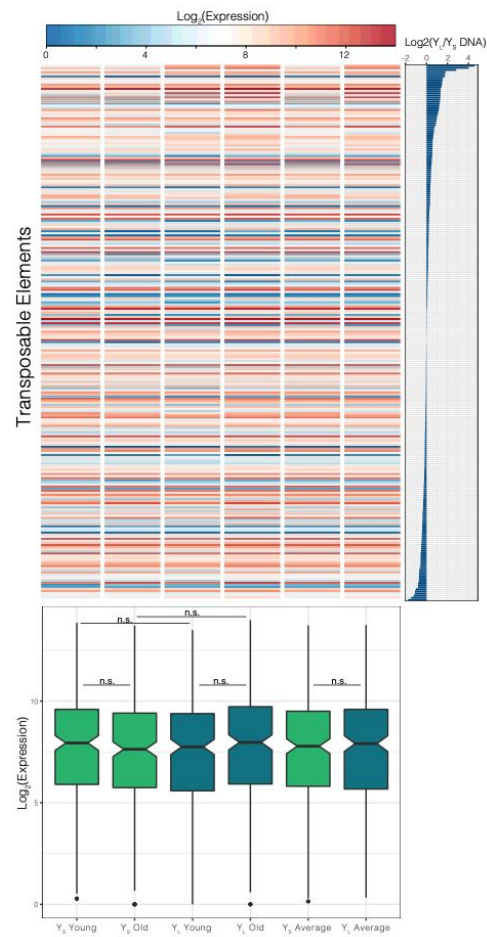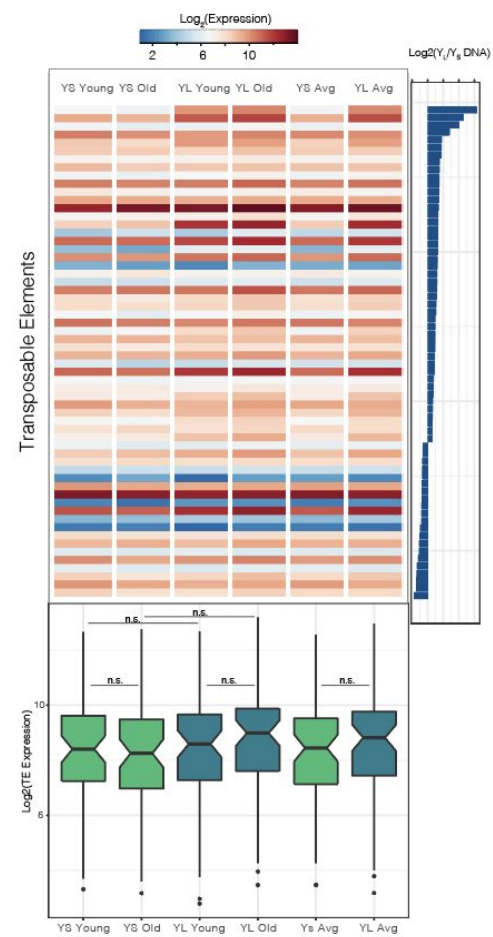

**Figure S16.** TE expression by Y-replacement line and age, sorted by TE abundance. (A) All TEs with  $\text{Log}_2(\text{expression}) > 1$ . (B) All TEs with  $\text{Log}_2(\text{expression}) > 1$  and 50% more TE abundance in either  $Y_s$  or  $Y_L$ .

Young samples

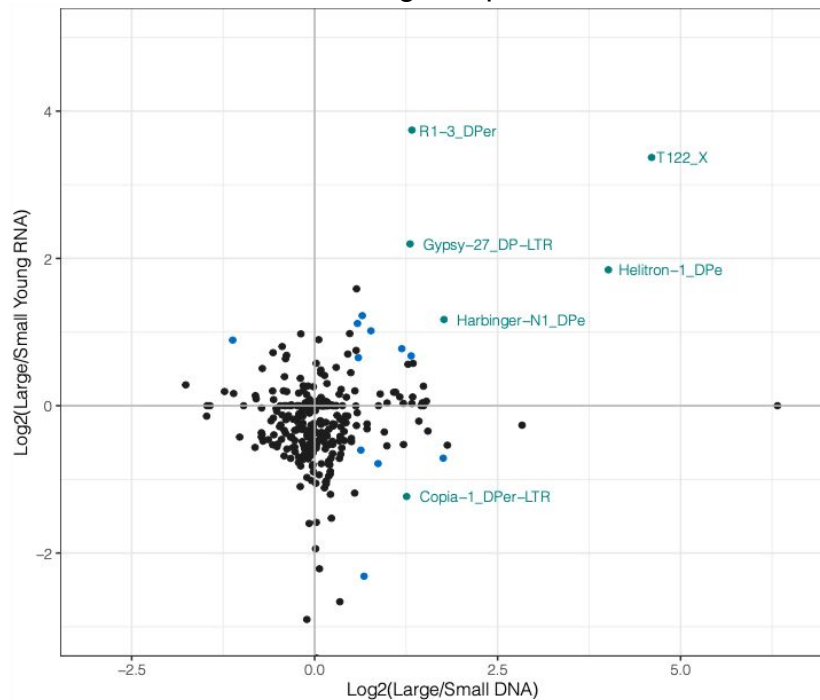

Old samples

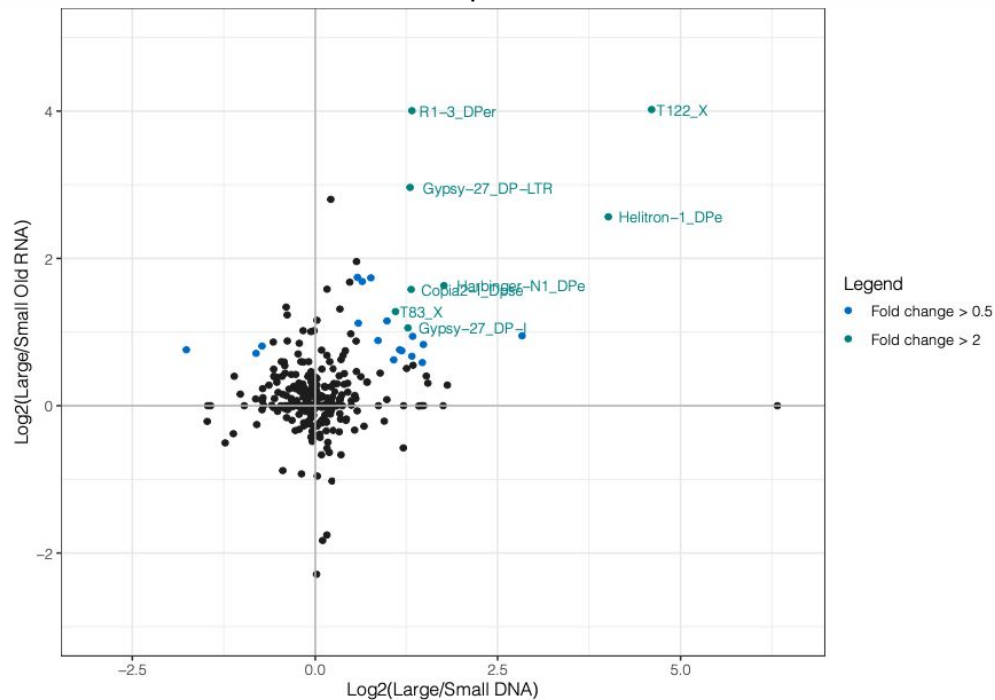

**Figure S17.** TE abundance differences vs TE expression differences in Y-replacement line males by age (left: young, right: old). Each data point represents a TE with its associated difference in abundance/expression between  $Y_S$  and  $Y_L$ . Plots were made from the same data that underlies Figure 4C.

Small Y-replacement line males

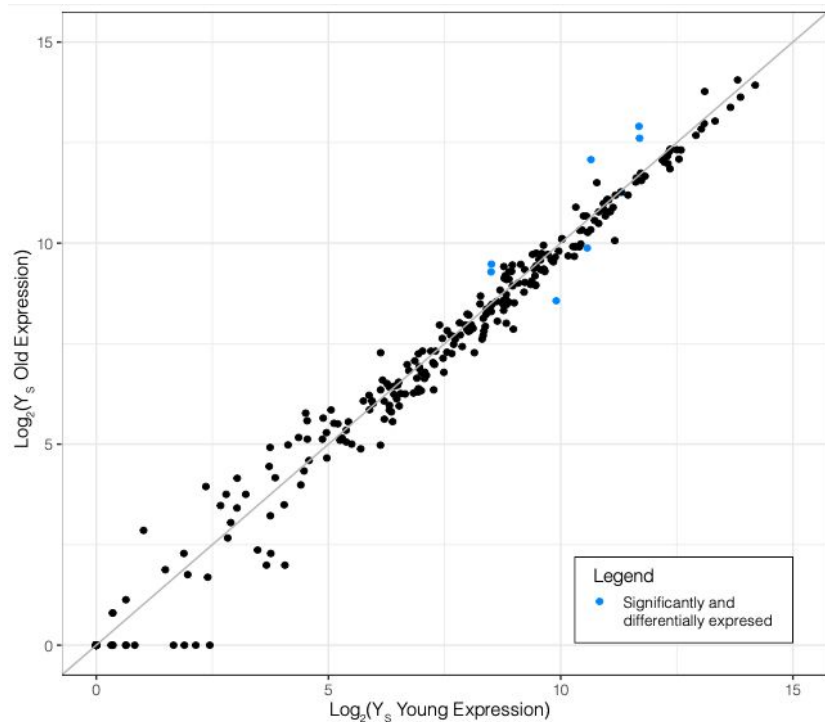

Large Y-replacement line males

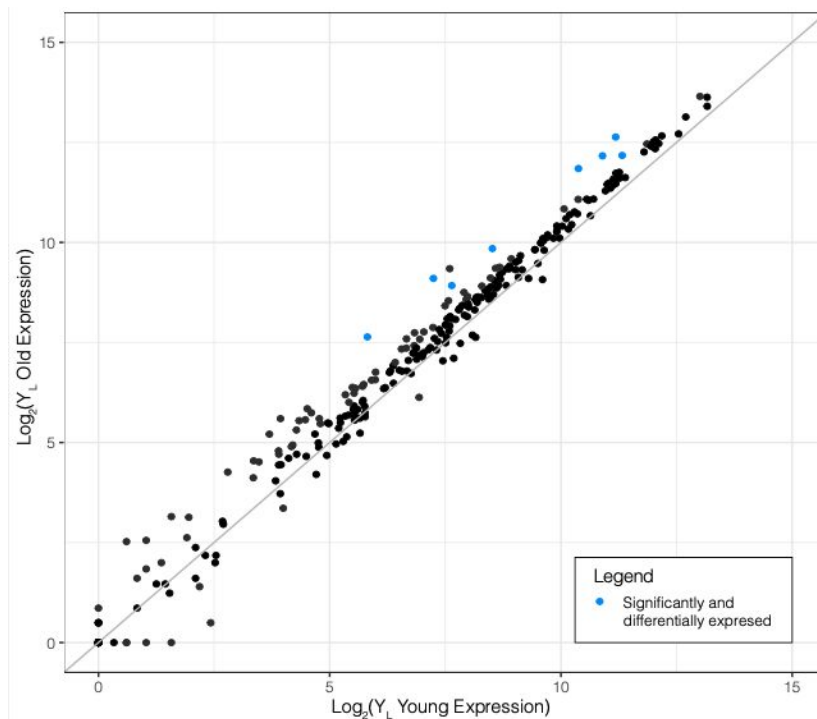

**Figure S18.** Age-associated TE expression differences within Y-replacement line males. Left:  $Y_s$  males, right:  $Y_L$  males. Blue data indicates at least 50% significant differential expression (Wald-test,  $p$ -value < 0.05).

N=174  
N=223  
N=201  
N=346

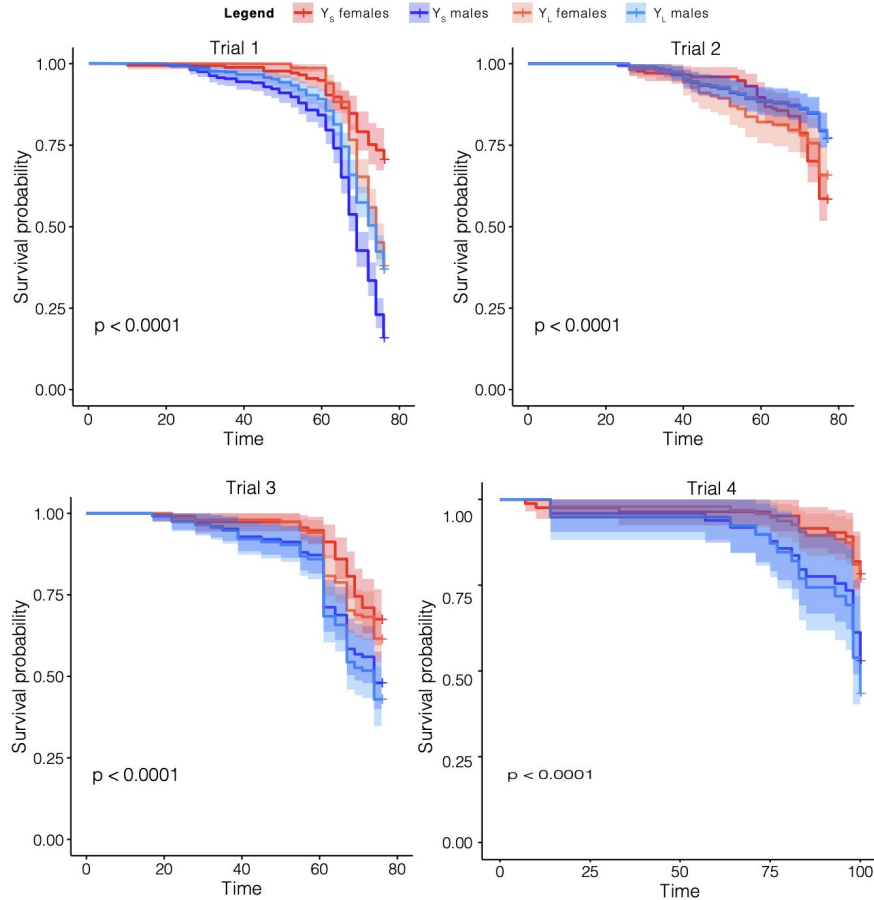

N=114  
N=125  
N=134  
N=203

N=178  
N=325  
N=150  
N=328

N=83  
N=49  
N=163  
N=110

**Figure S19.** Y-replacement line aging trials recorded separately. All aging trials are shown with females from both Y-replacement line males plotted as individual tracks.

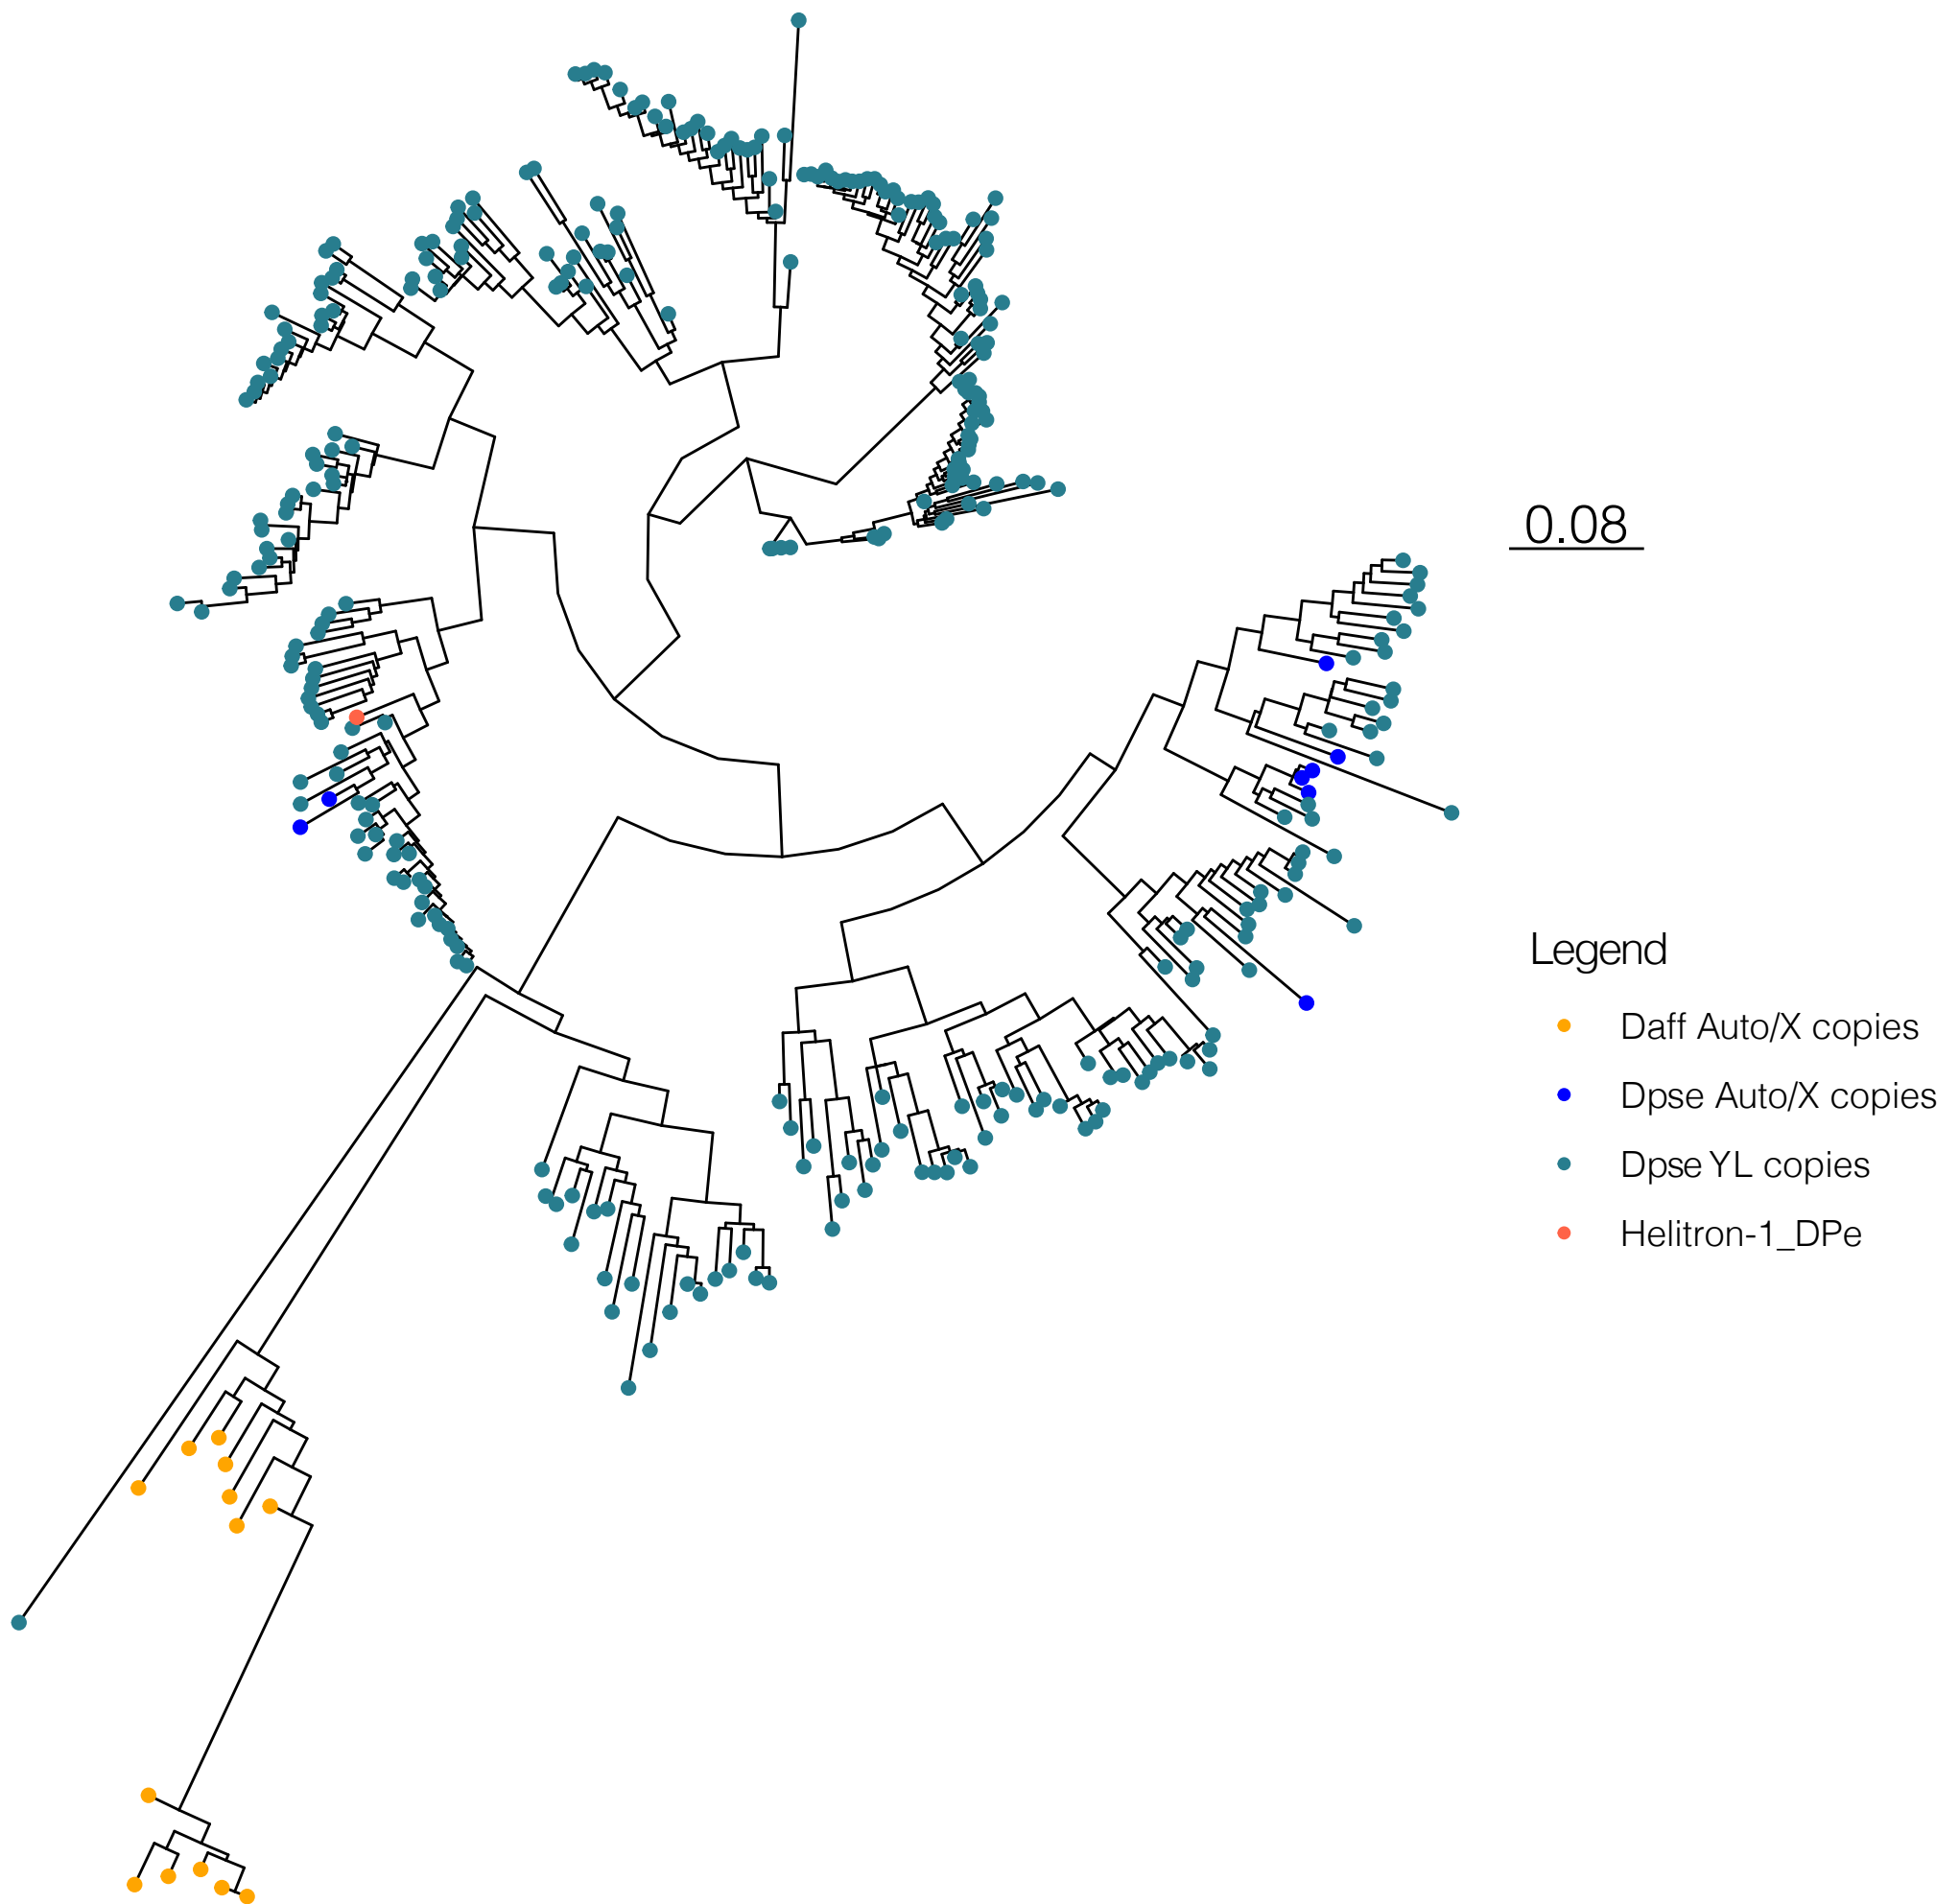

Figure S20. Phylogeny of Helitron elements from the *D. pseudoobscura* autosomes/X, *D. pseudoobscura* YL, and *D. affinis* autosomes/X.
